# Supplementary material for: Synthesis and bio-molecular study of (+)-N-Acetyl-α-amino acid dehydroabietylamine derivative for the selective therapy of hepatocellular carcinoma
Source: Springer Nature journal article supplement (doi:10.1186/s12885-016-2942-5), 2016-11-14

## Table of Contents

<sup>1</sup>H-NMR, <sup>13</sup>C-NMR BB, <sup>13</sup>C-NMR DEPT-90, <sup>13</sup>C-NMR DEPT-135, FT-IR, ESI<sup>+</sup>-MS, **S2-S36**  
COSY-NMR, HMBC-NMR, HSQC-NMR, NOESY-NMR Spectra of Compounds **1-7**

# Compound 1 <sup>1</sup>H NMR

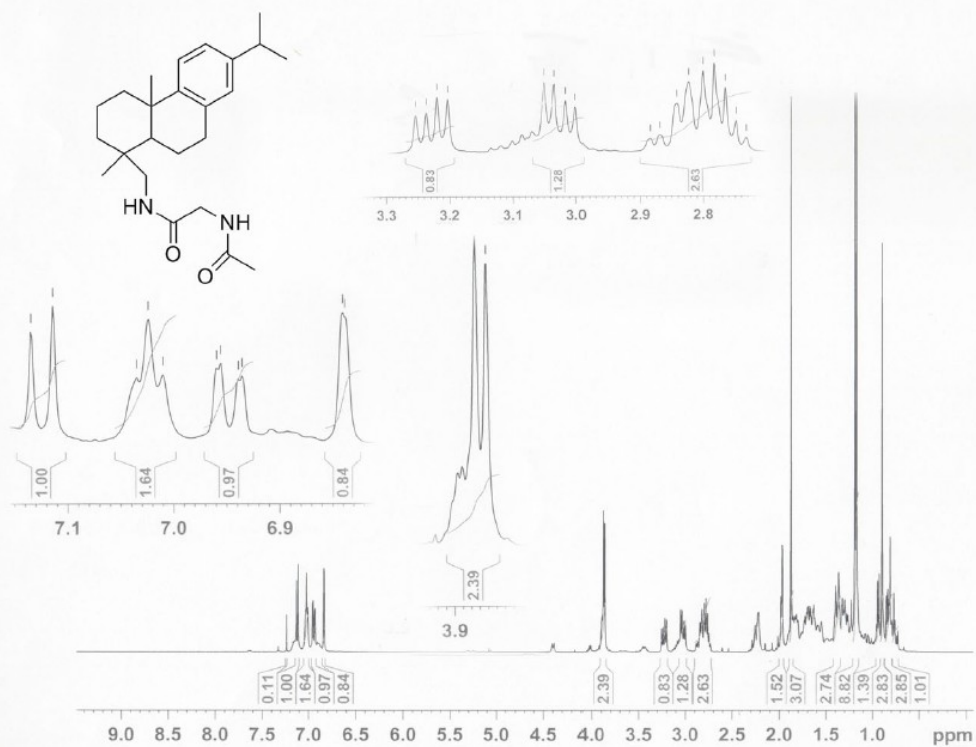

# Compound 1 <sup>13</sup>C BB

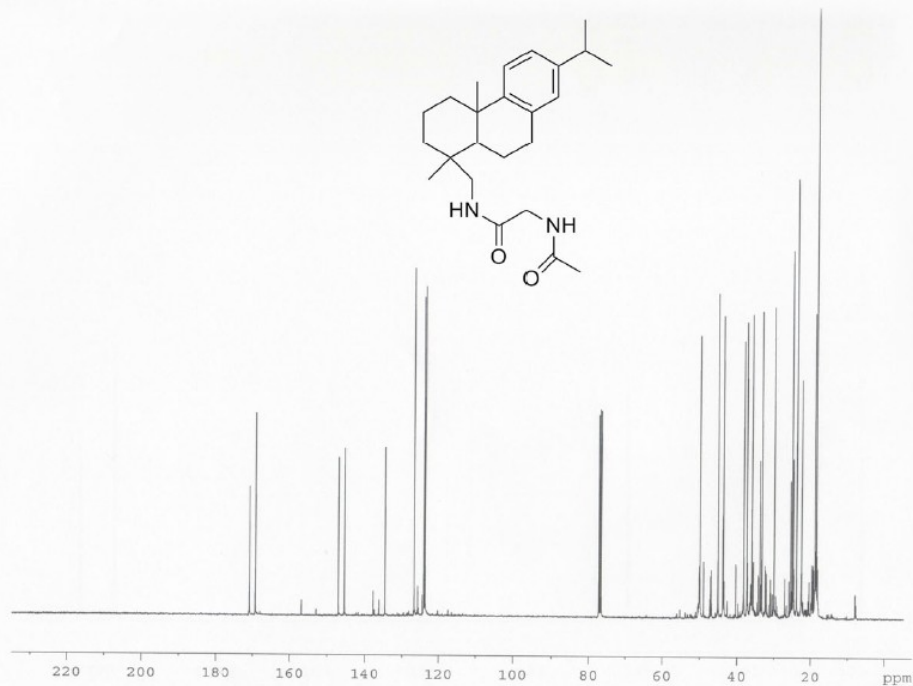

Compound 1 DEPT 90

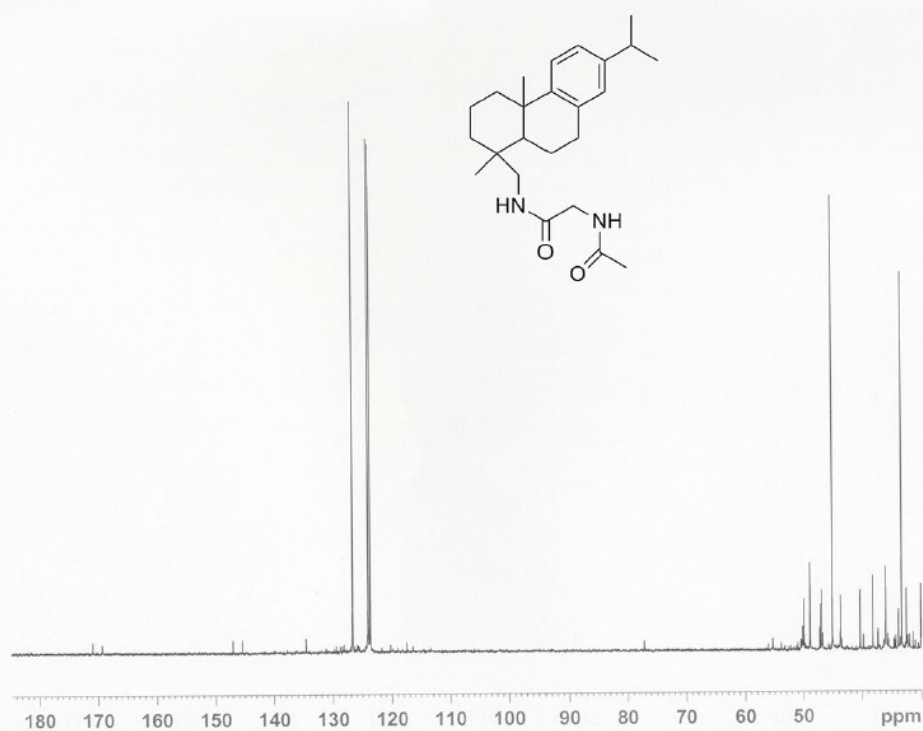

Compound 1 DEPT 135

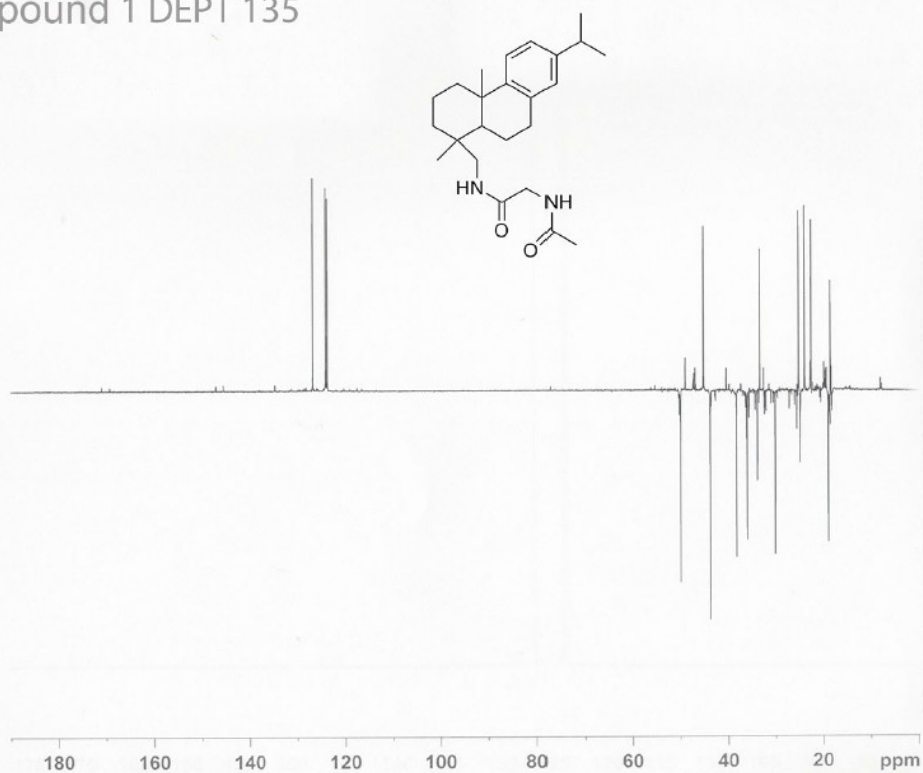

### Compound 1 FTIR

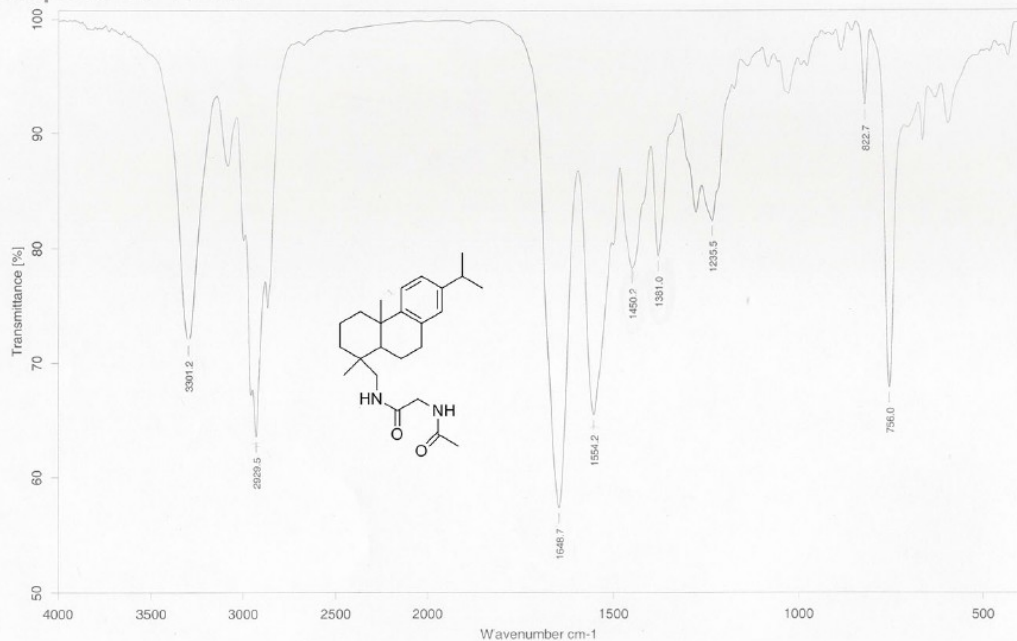

### Compound 1 +TOF MS

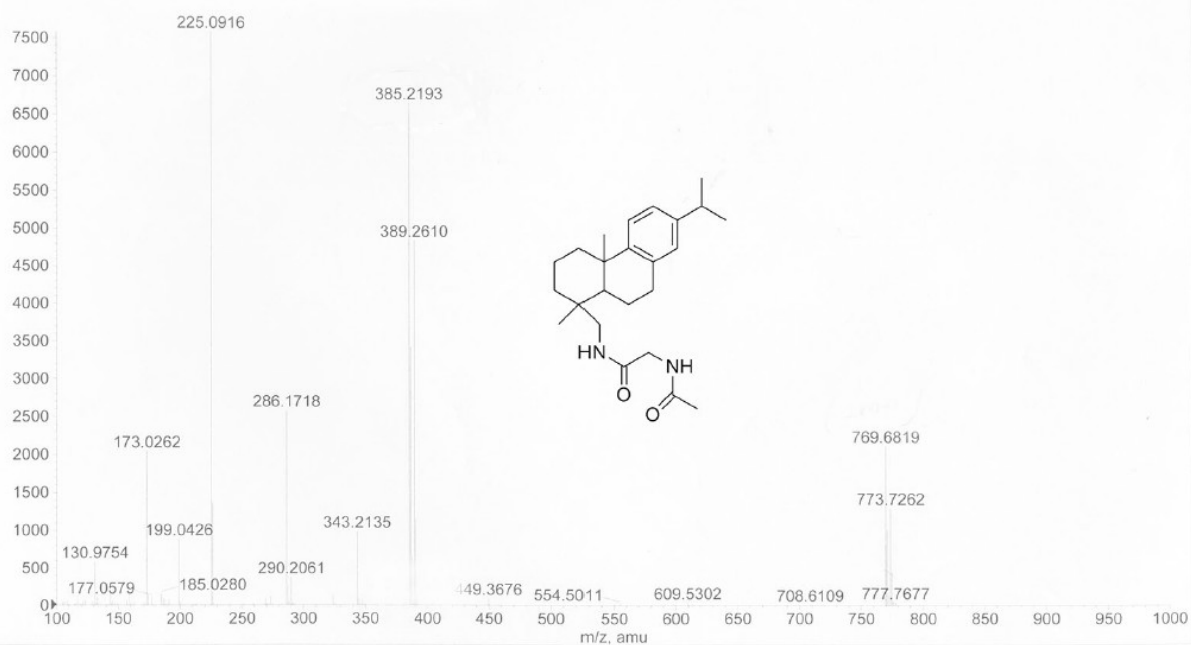

# Compound 1 COSY

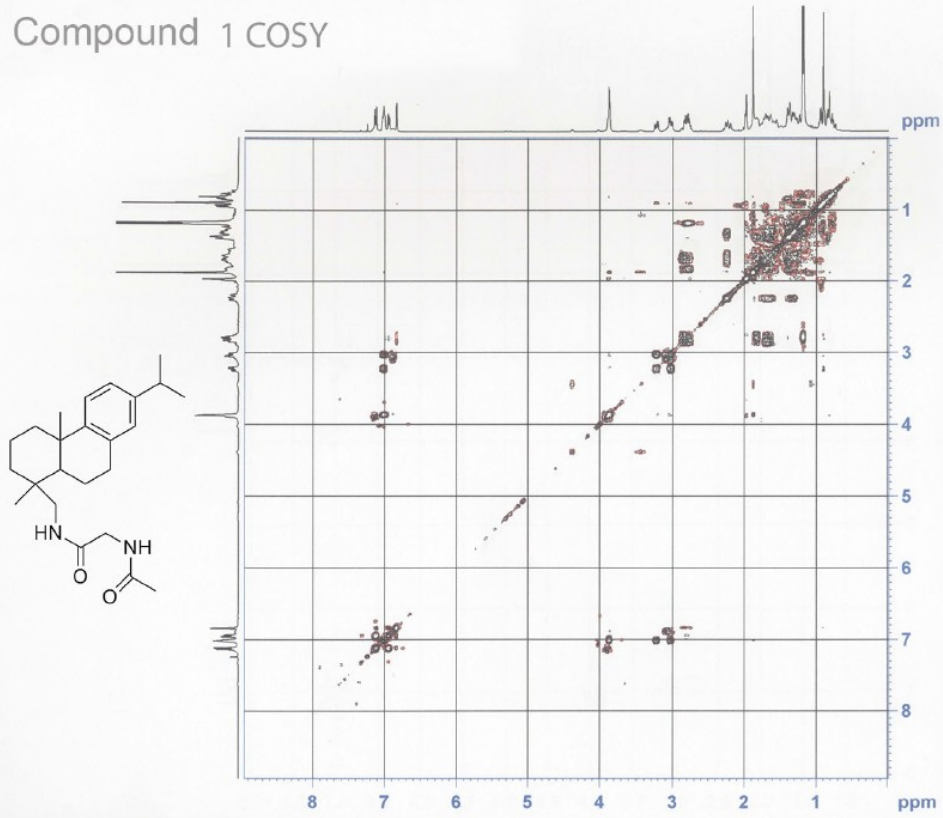

# Compound 1 HMBC

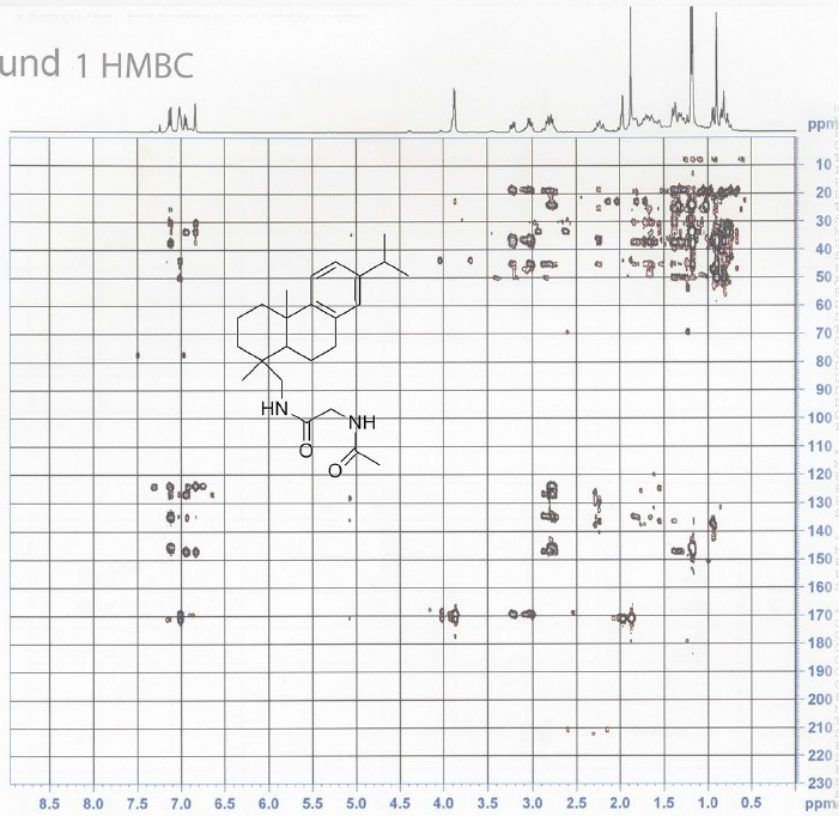

# Compound 1 HSQC

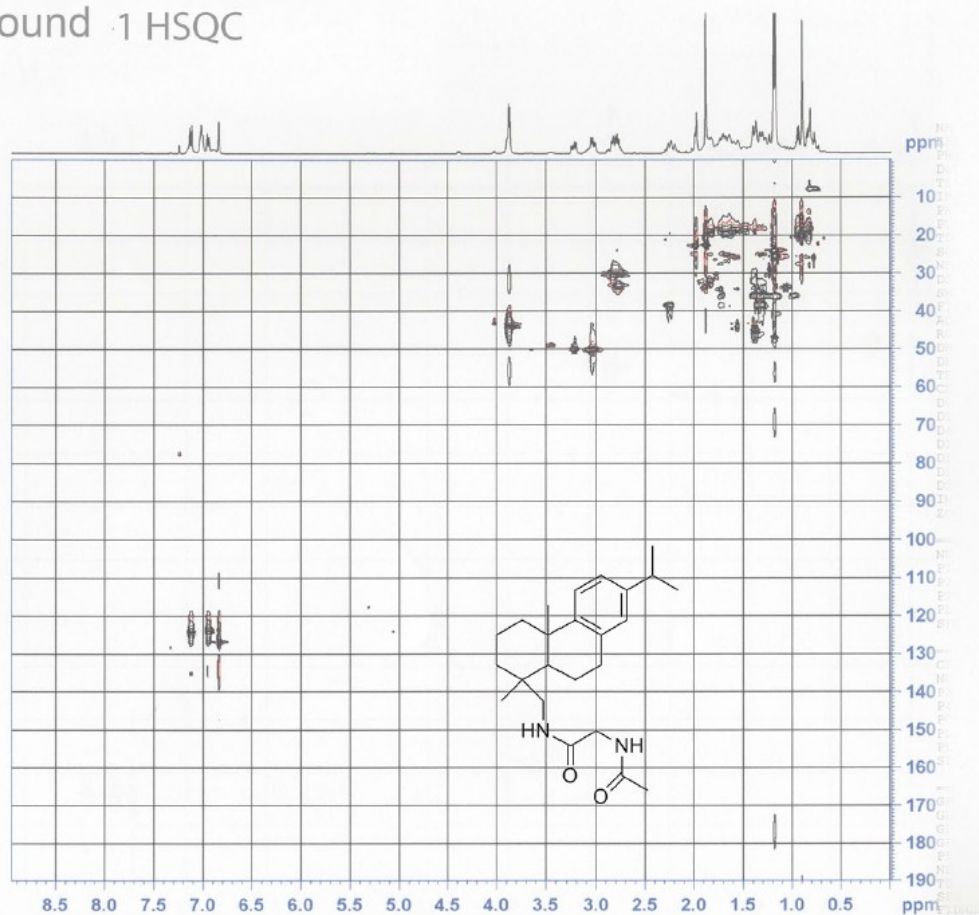

# Compound 1 NOESY

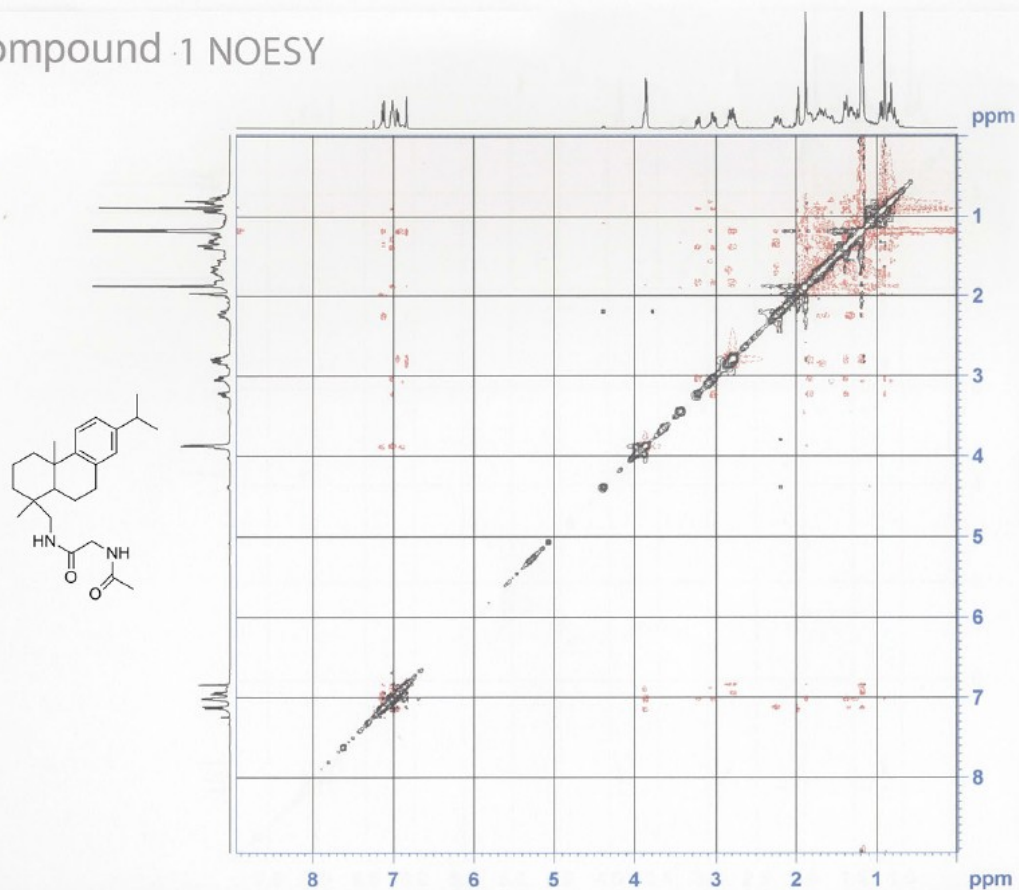

# Compound 2 1H NMR

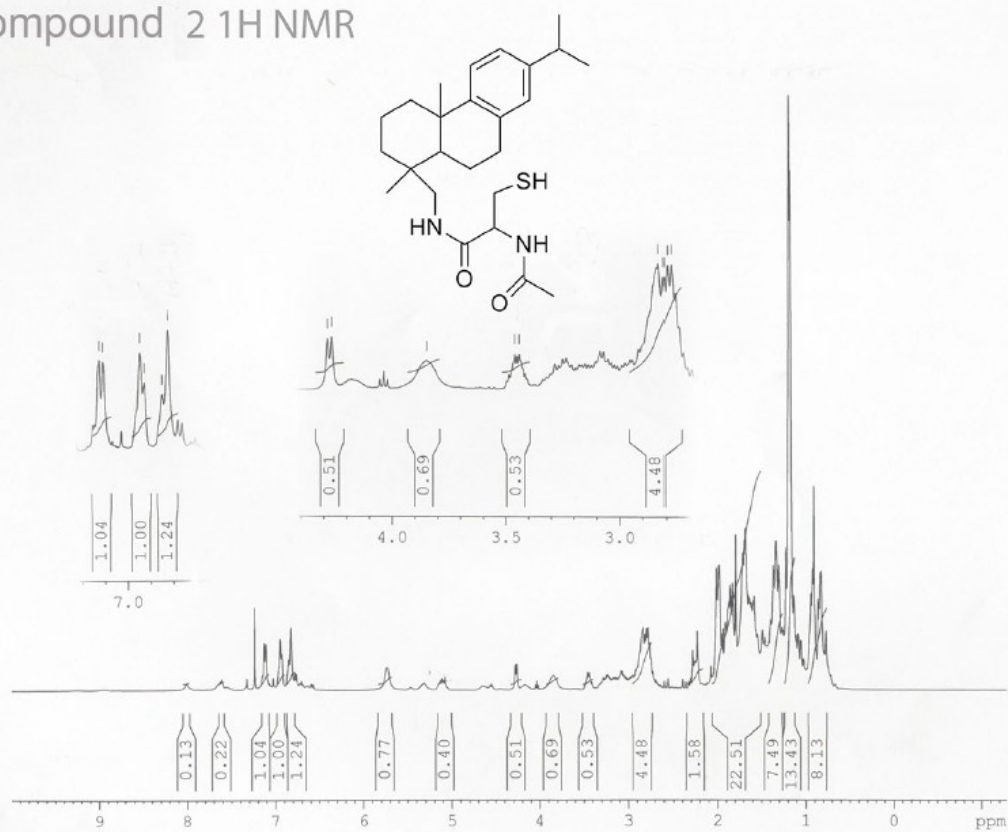

# Compound 2 13C BB

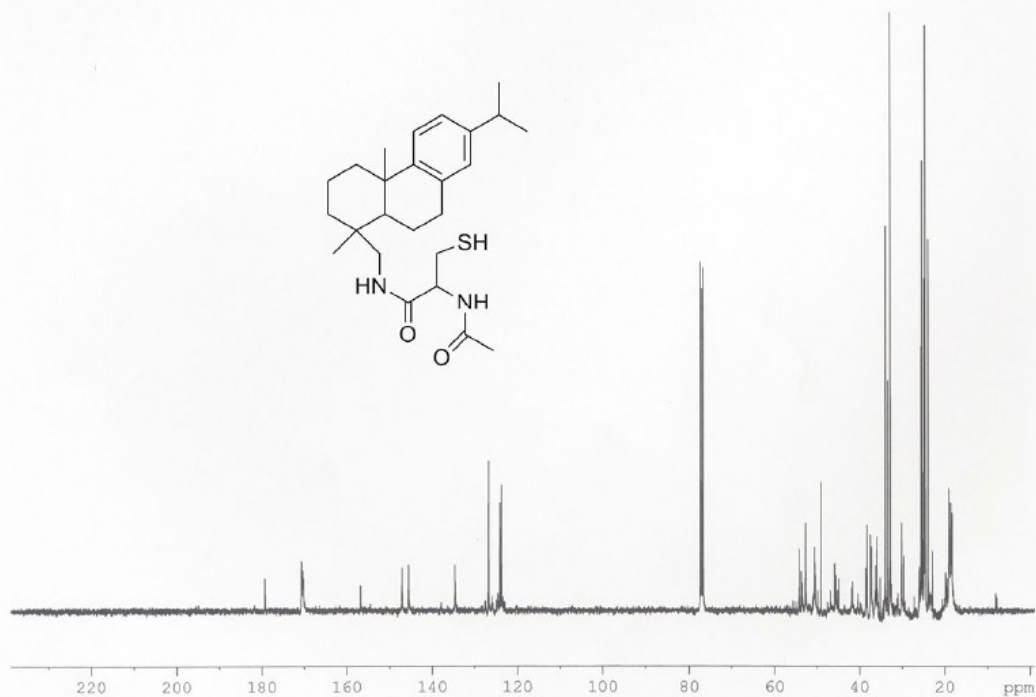

Compound -2 DEPT 90

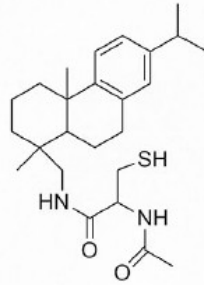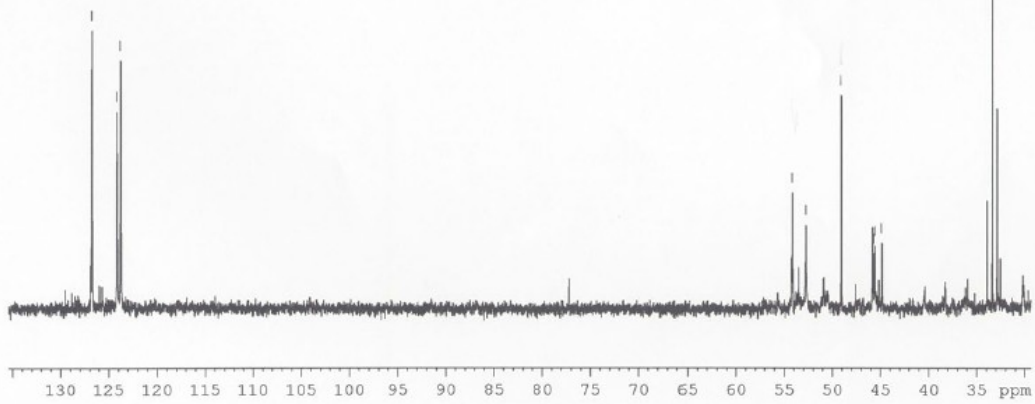

Compound -2 DEPT 135

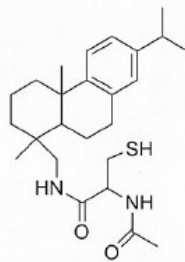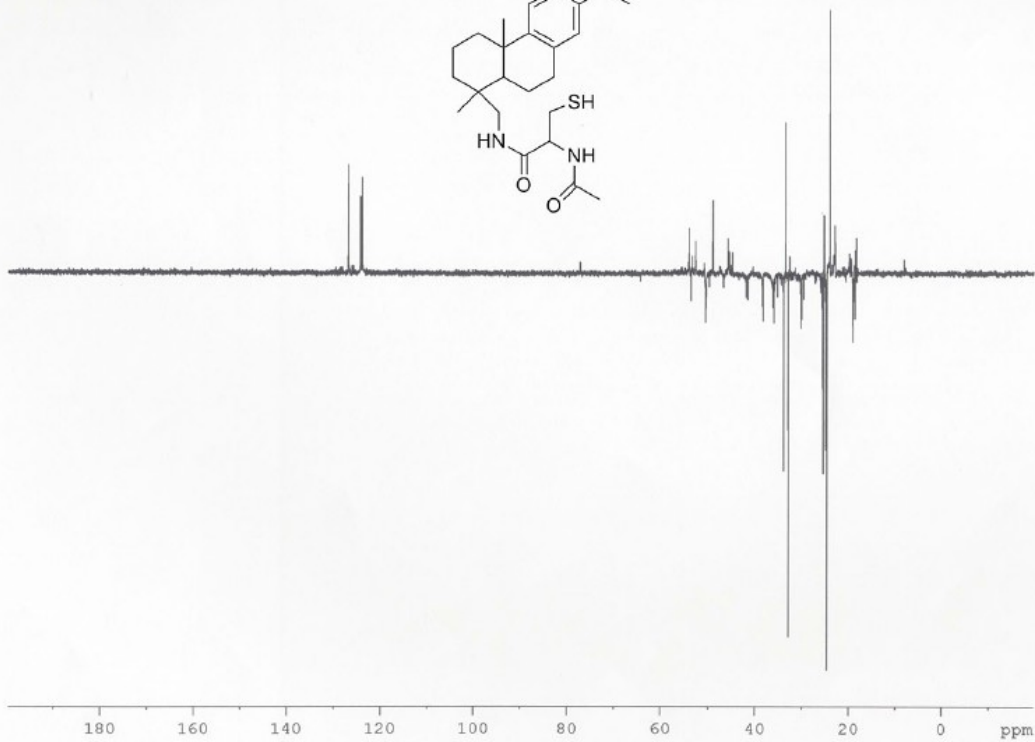



## Compound 2 FTIR

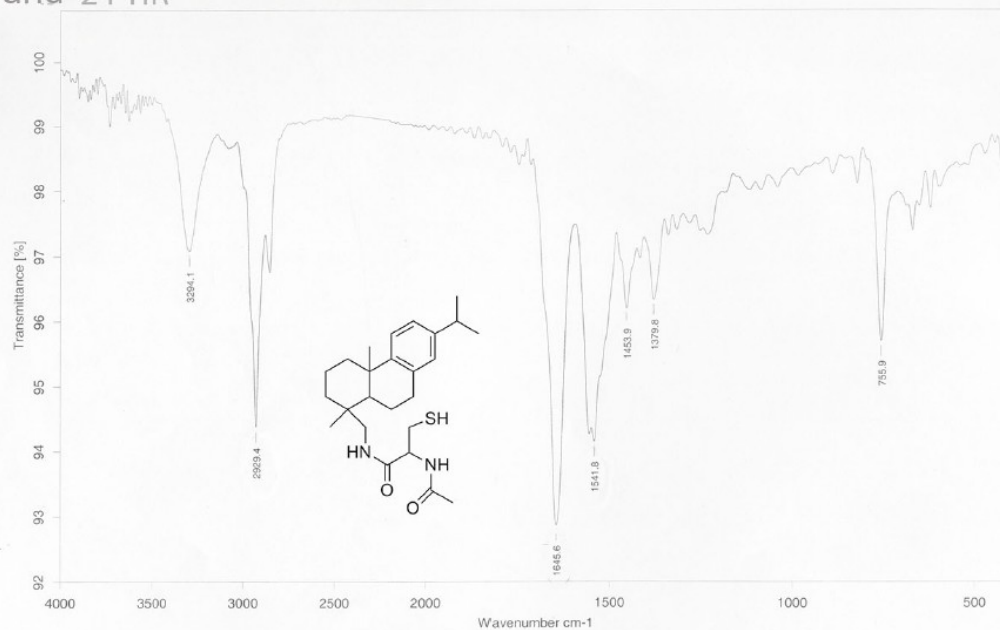

## Compound 2 + TOF MS

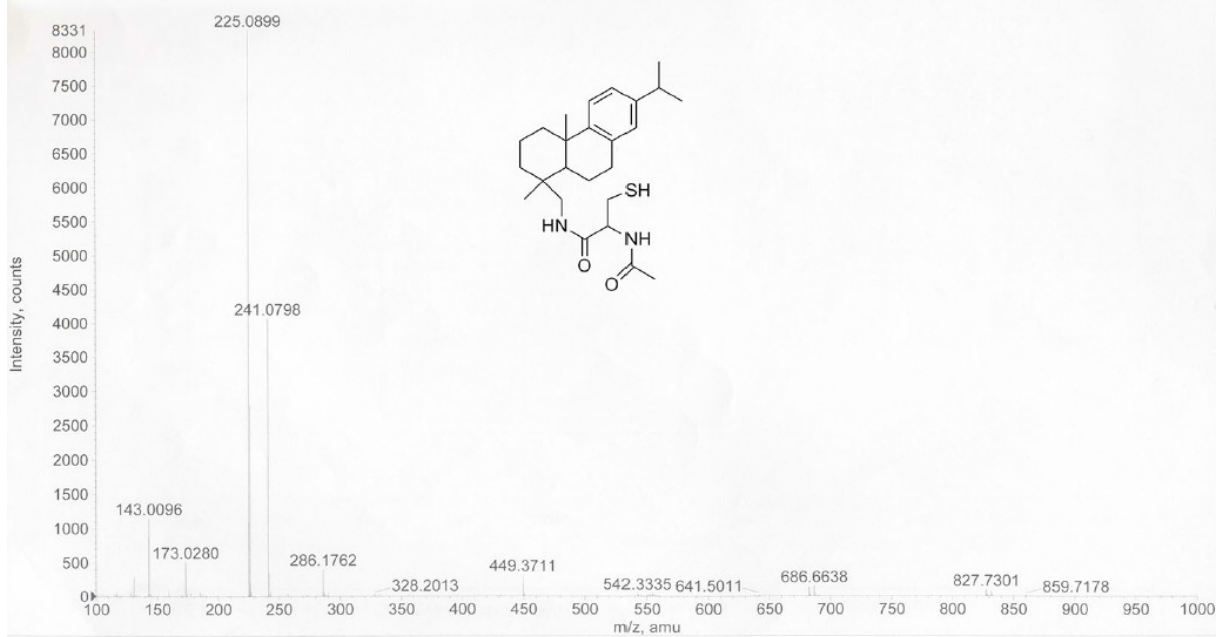

## Compound-2 COSY

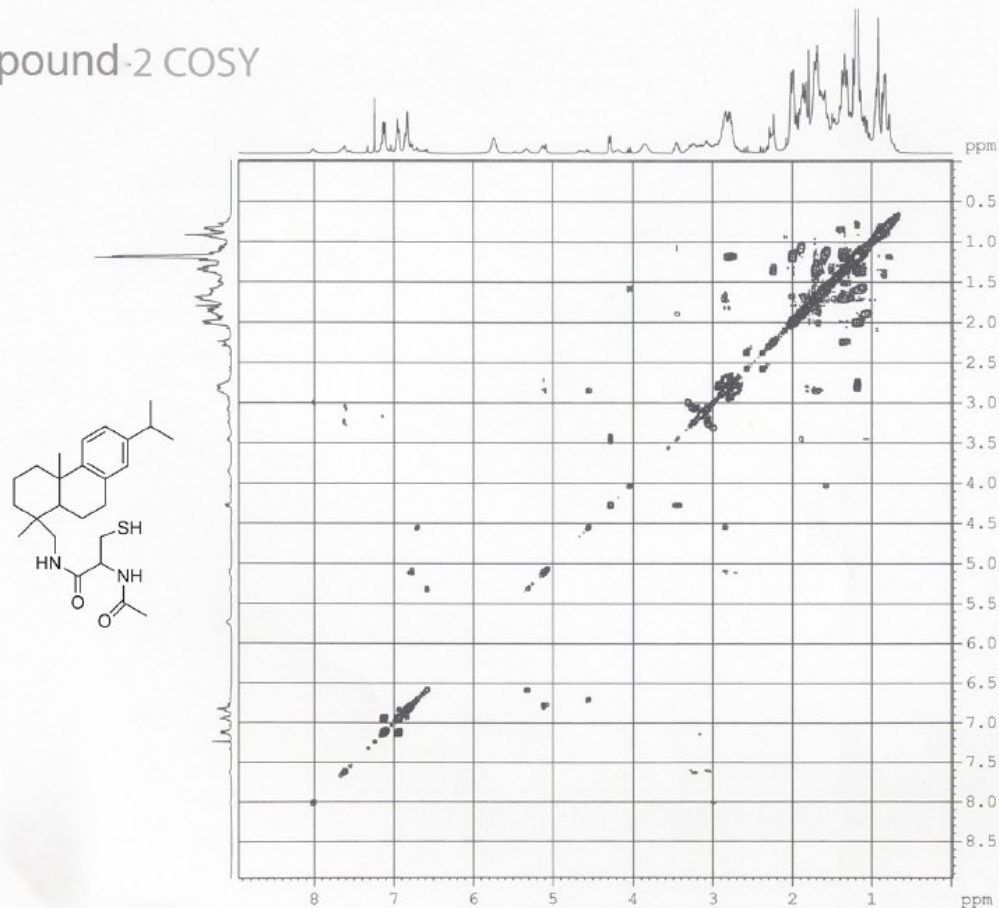

## Compound 2 HMBC

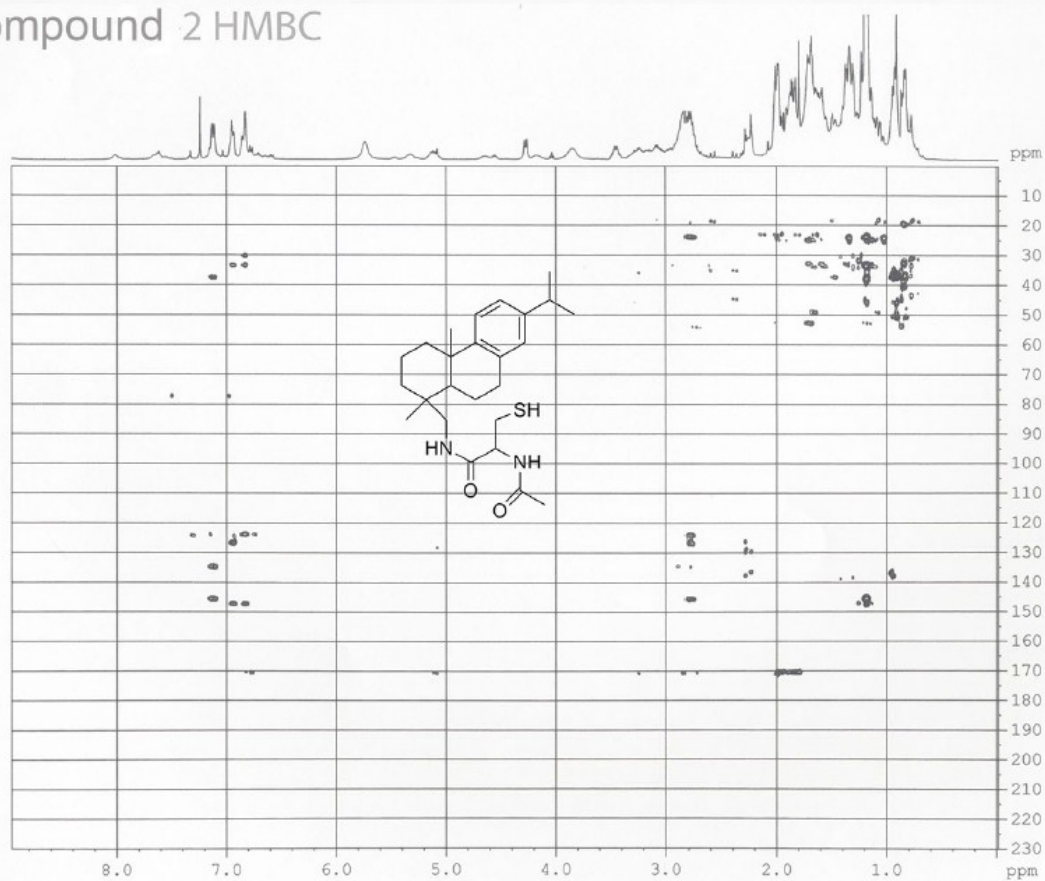

# Compound 2 HSQC

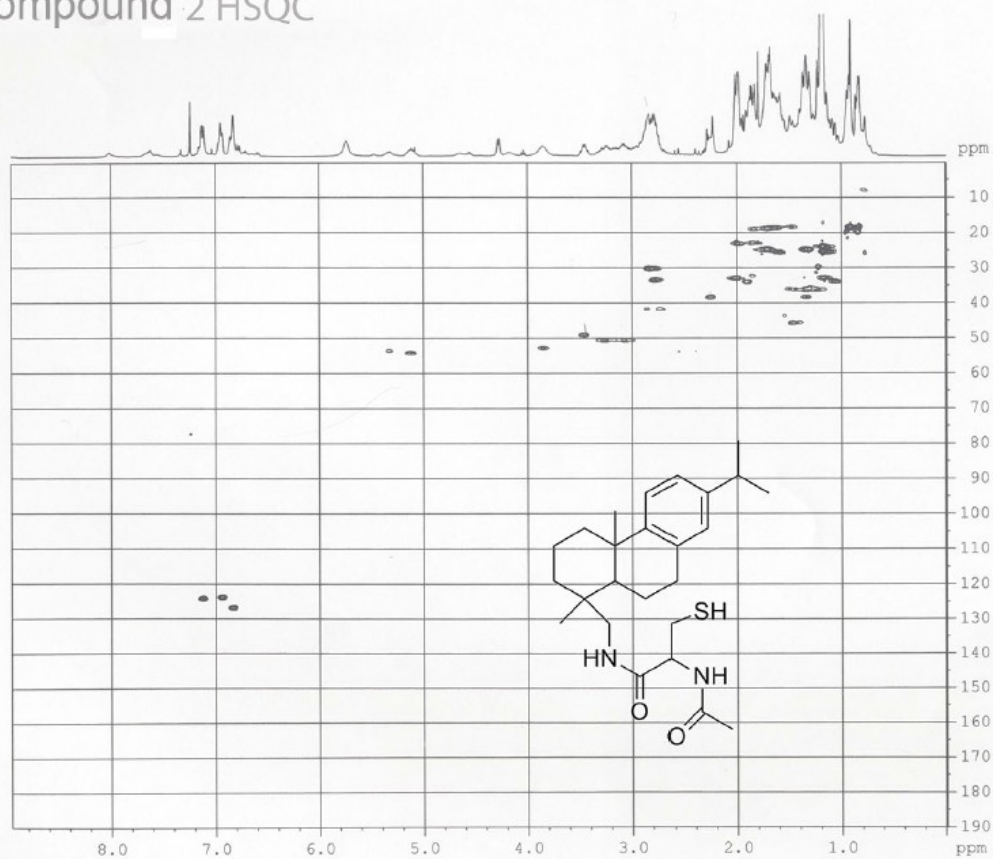

# Compound 2 NOESY

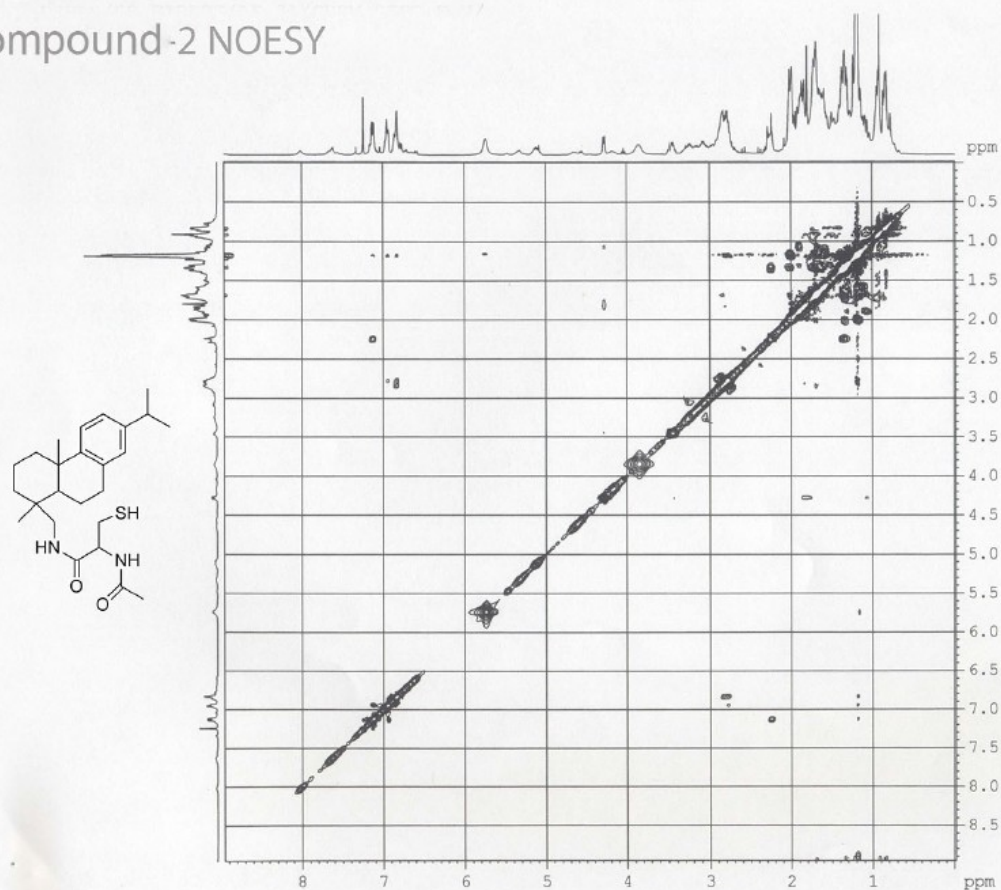

### Compound 3 1H NMR

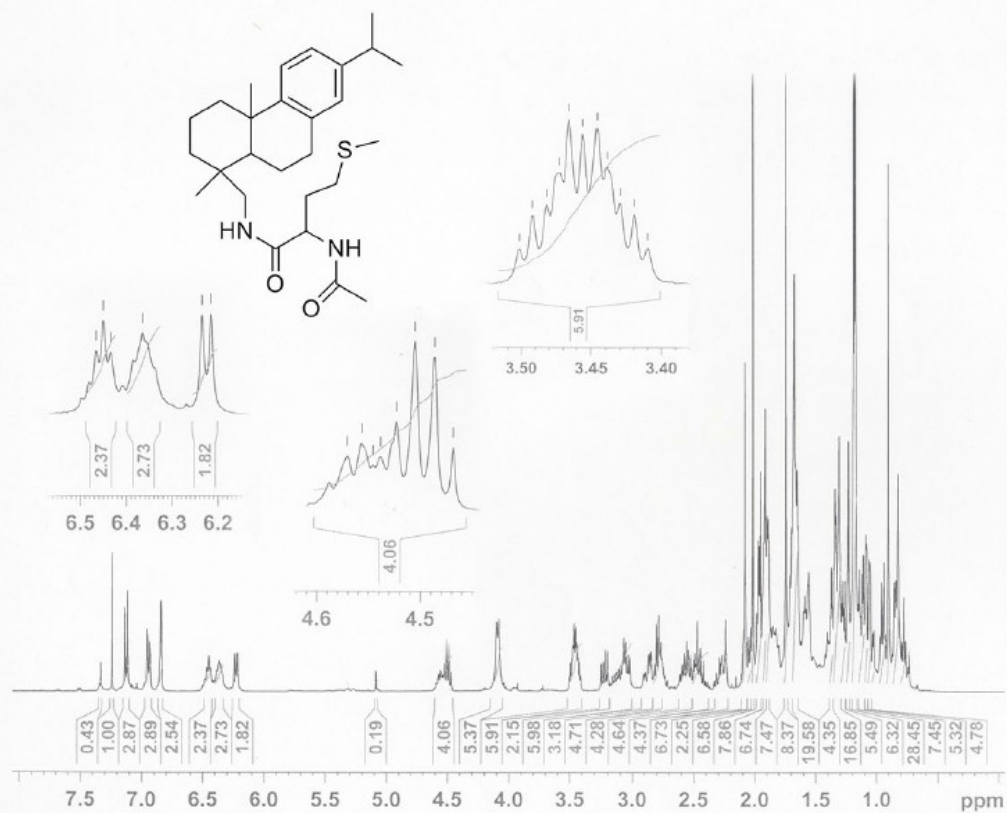

### Compound 3 13C BB

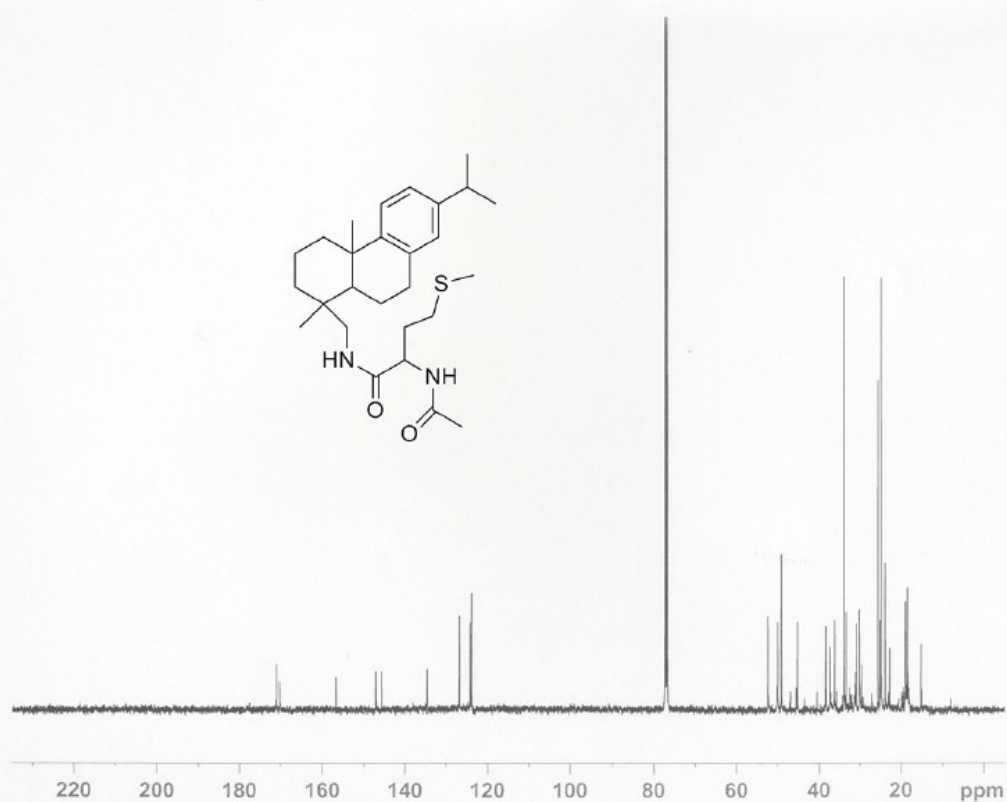

### Compound 3 DEPT 90

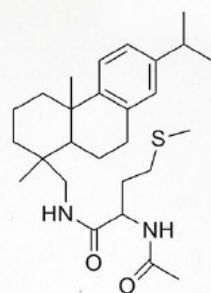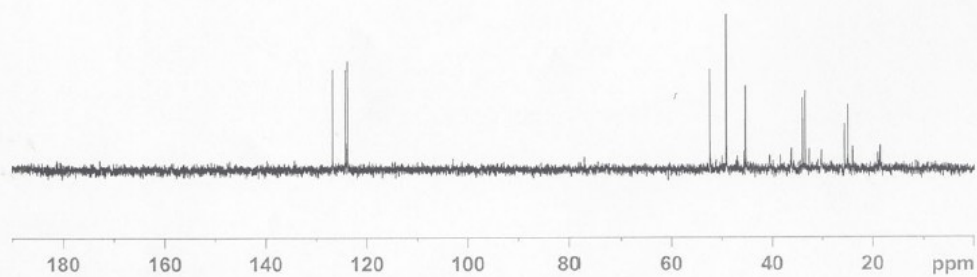

### Compound 3 DEPT 135

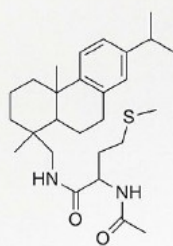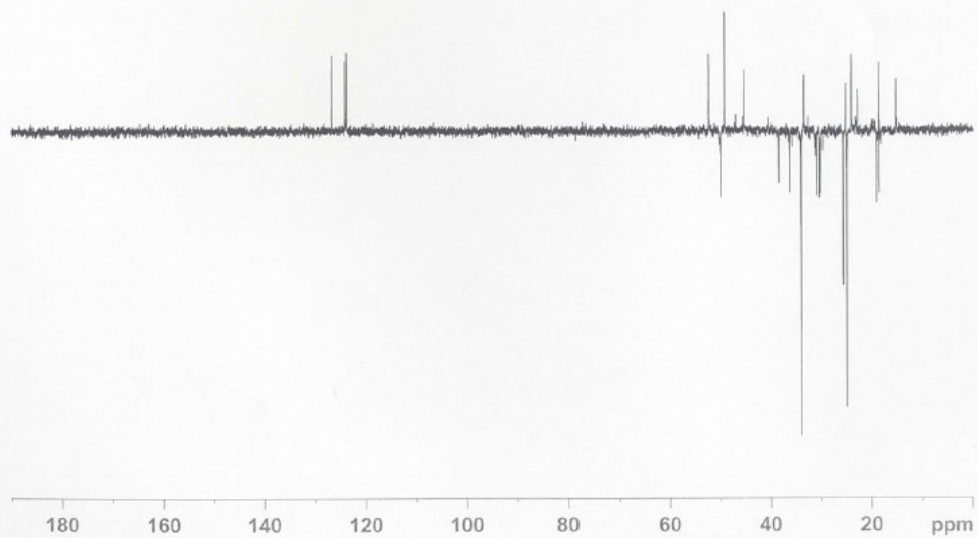

# Compound-3 FTIR

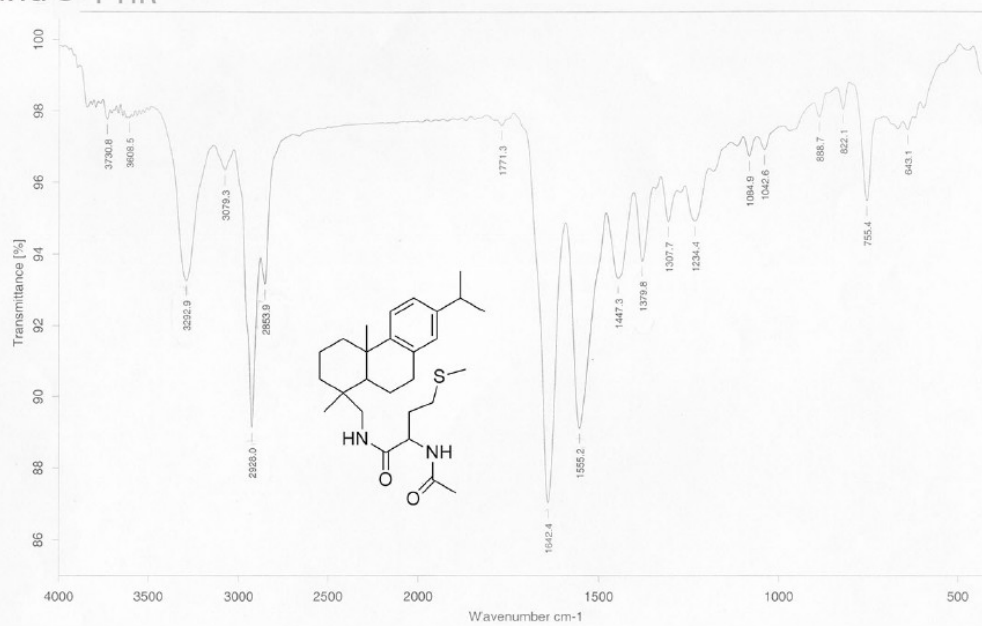

# Compound-3 + TOF MS

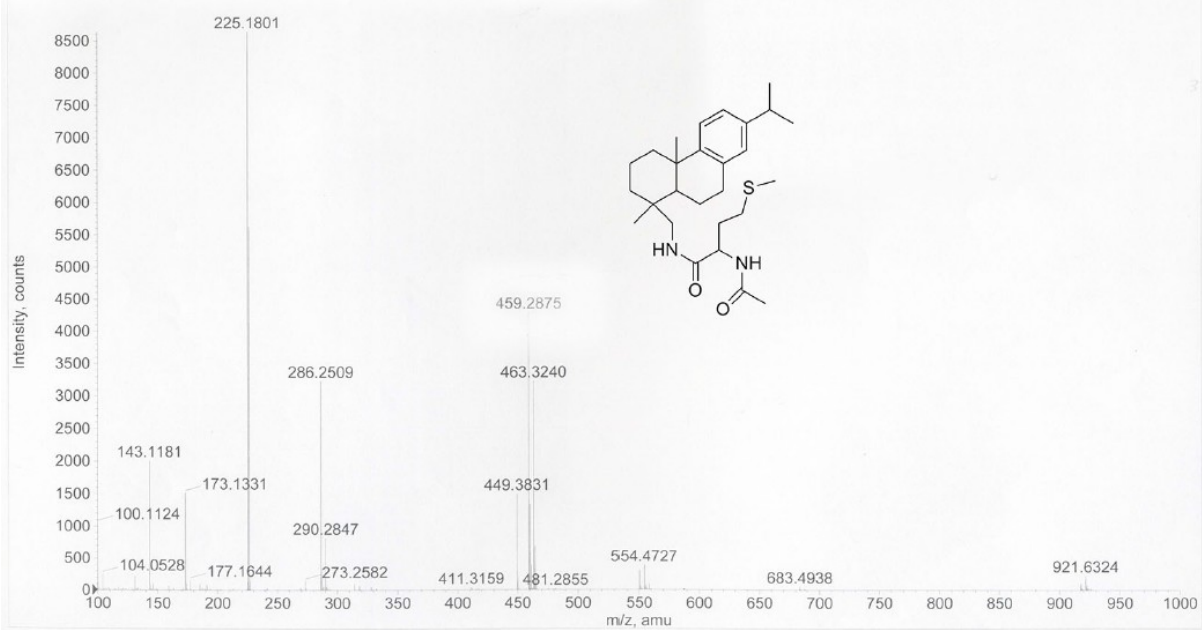

### Compound 3 COSY

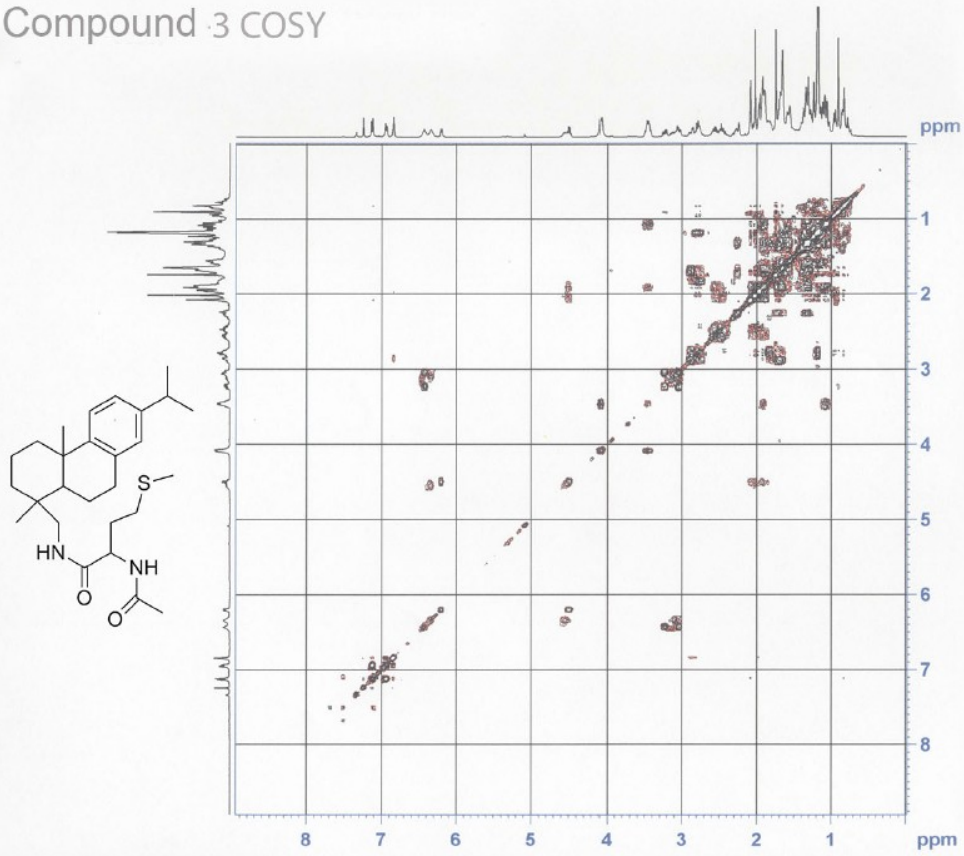

### Compound 5 HMBC

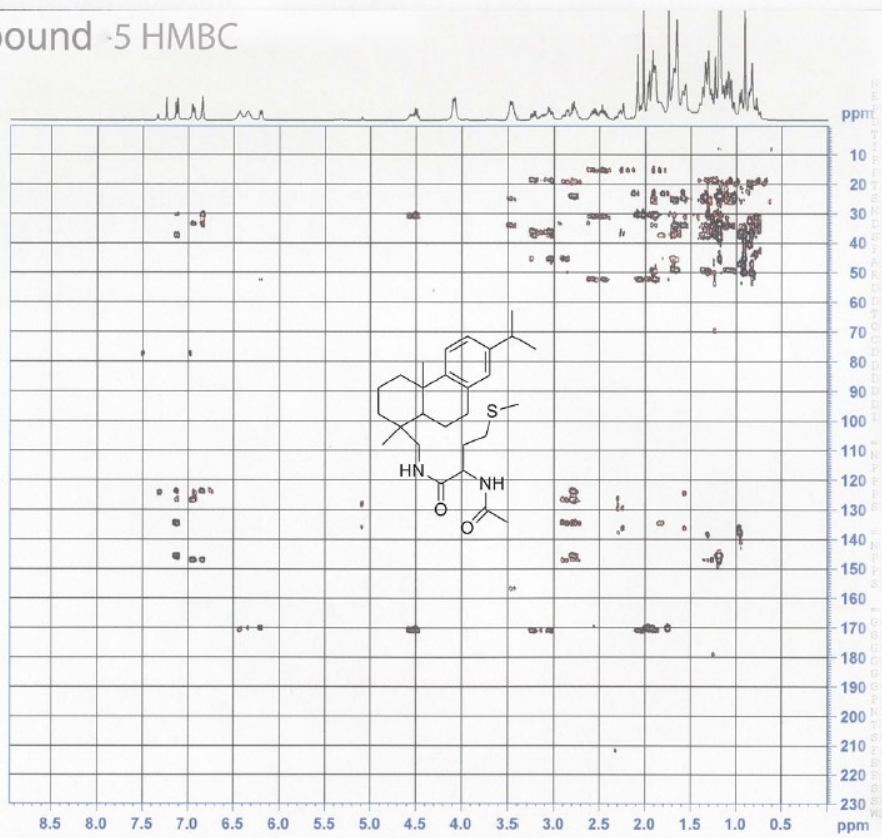

# Compound-3 HSQC

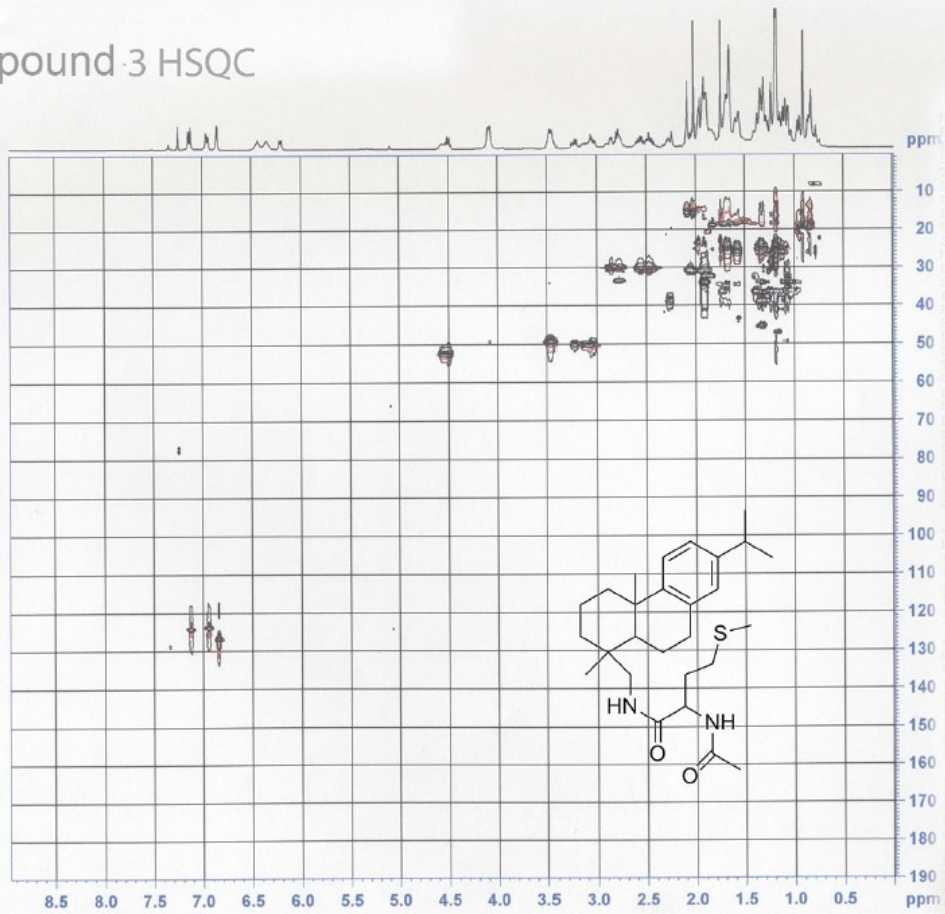

# Compound-3 NOESY

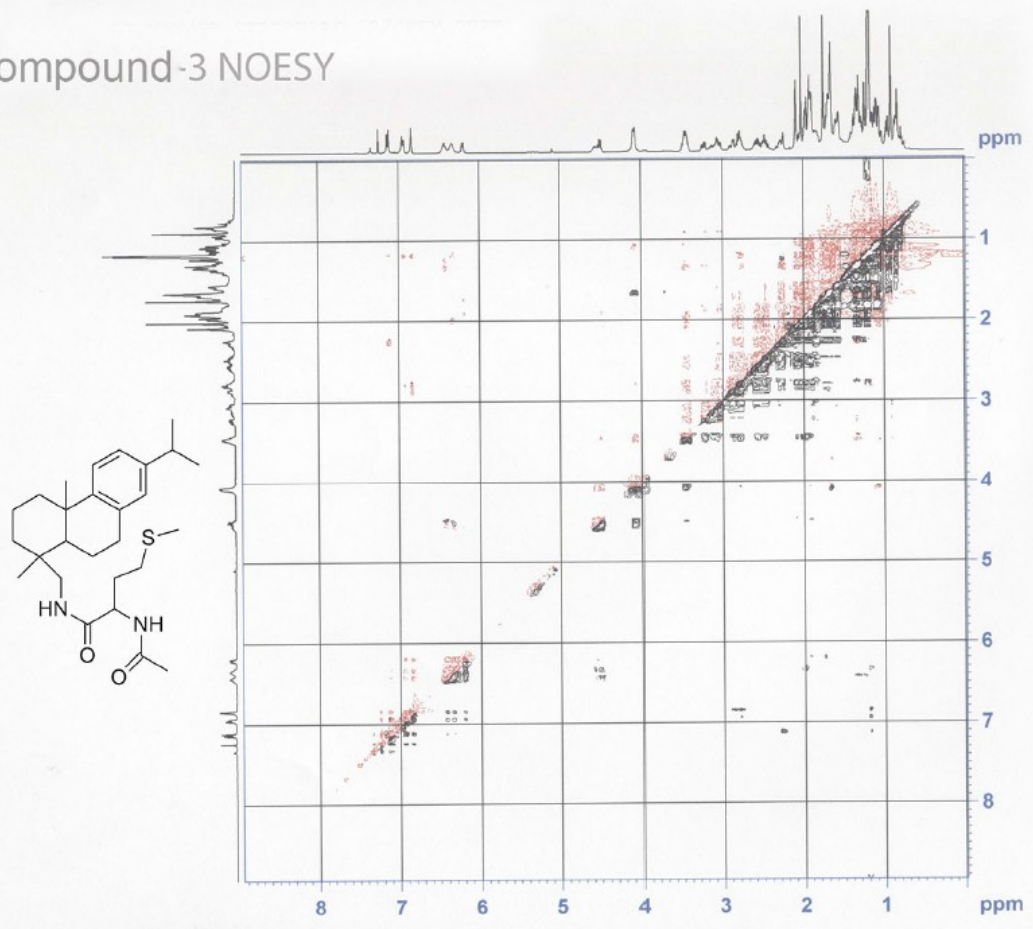



# Compound 4 1H NMR

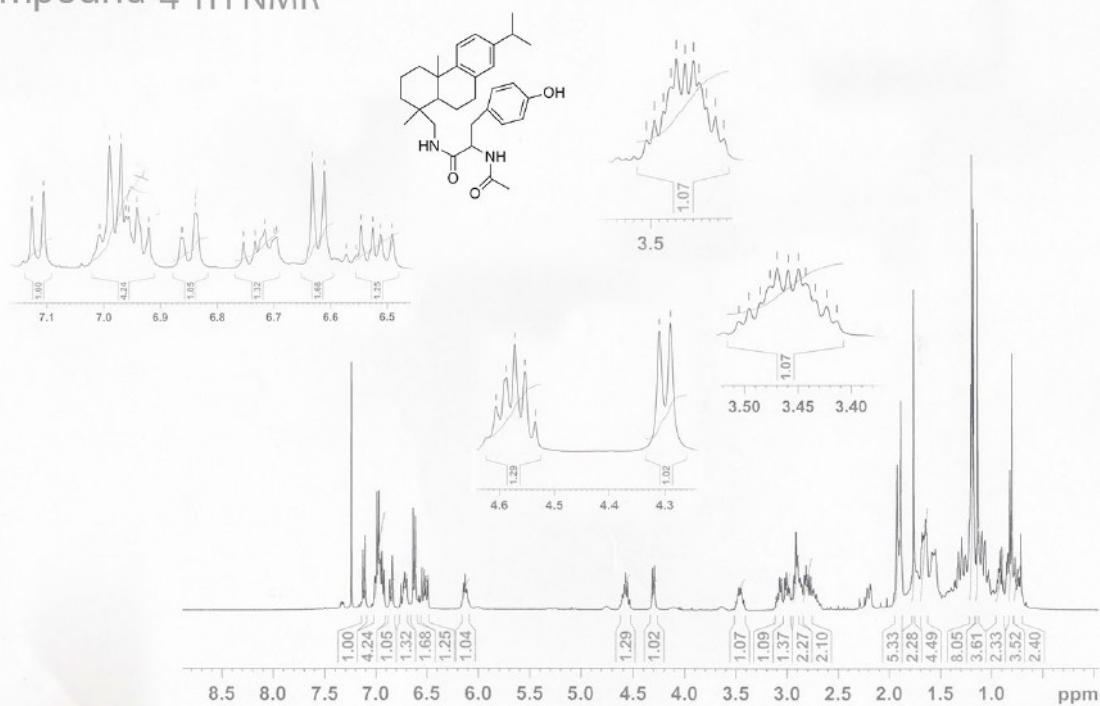

# Compound 4 13C BB

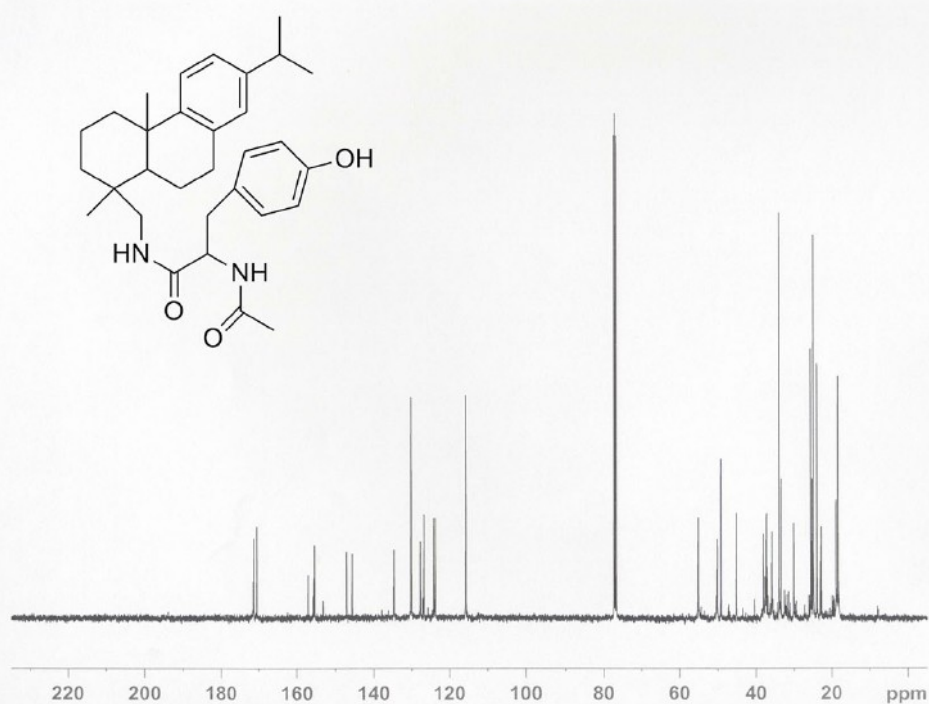

# Compound 4 DEPT 90

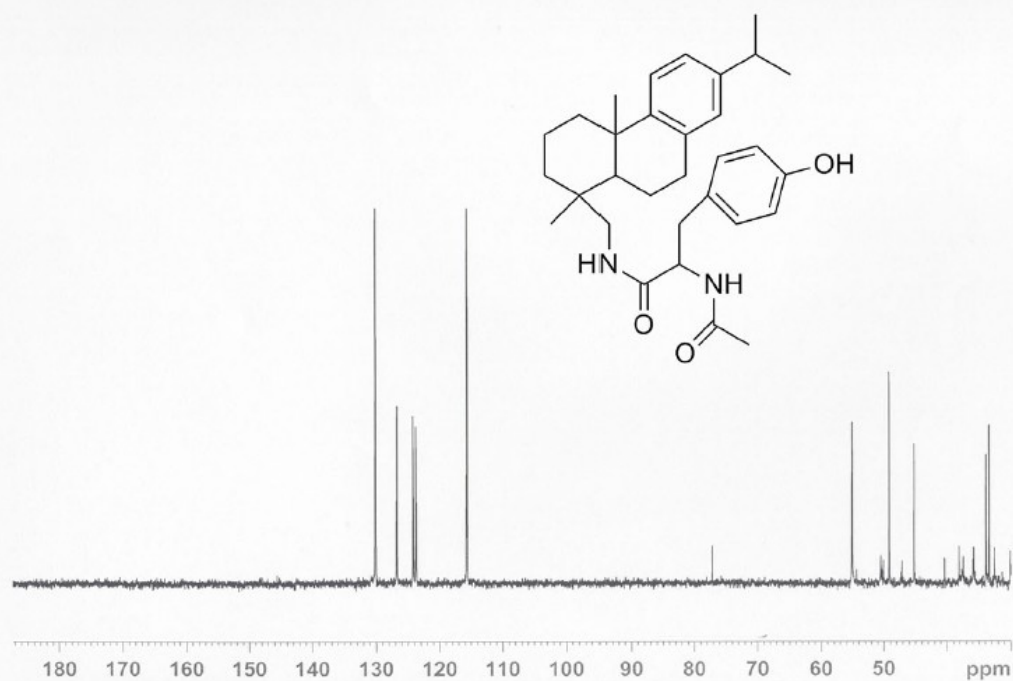

# Compound 4 DEPT 135

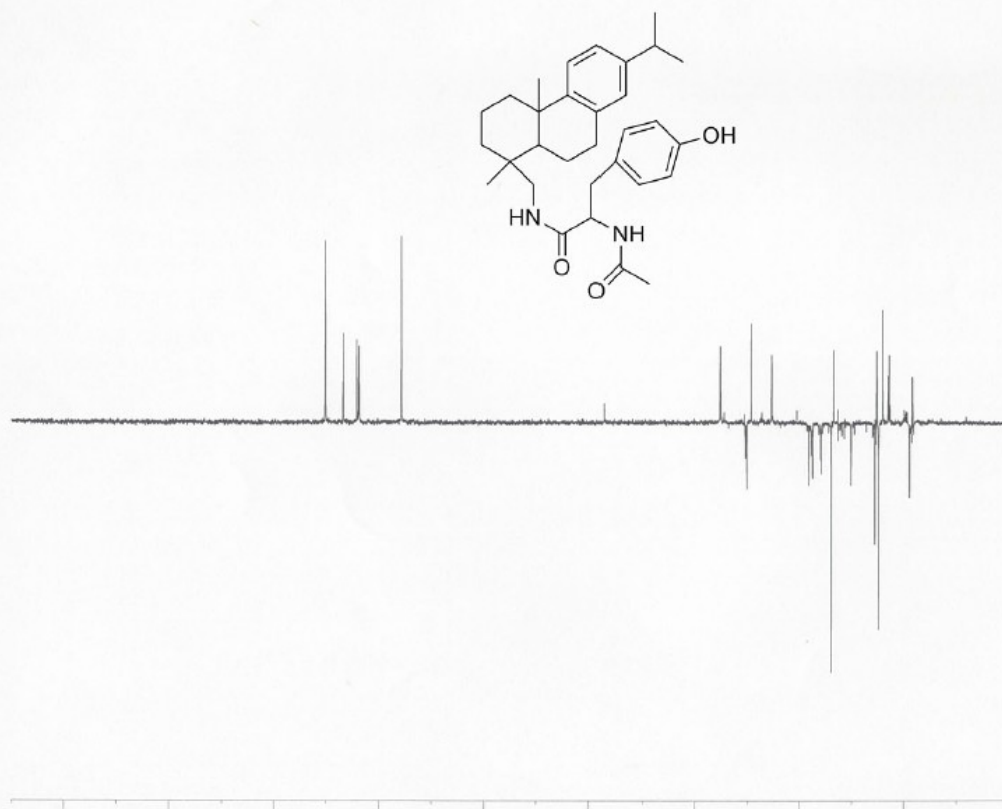

# Compound 4 FTIR

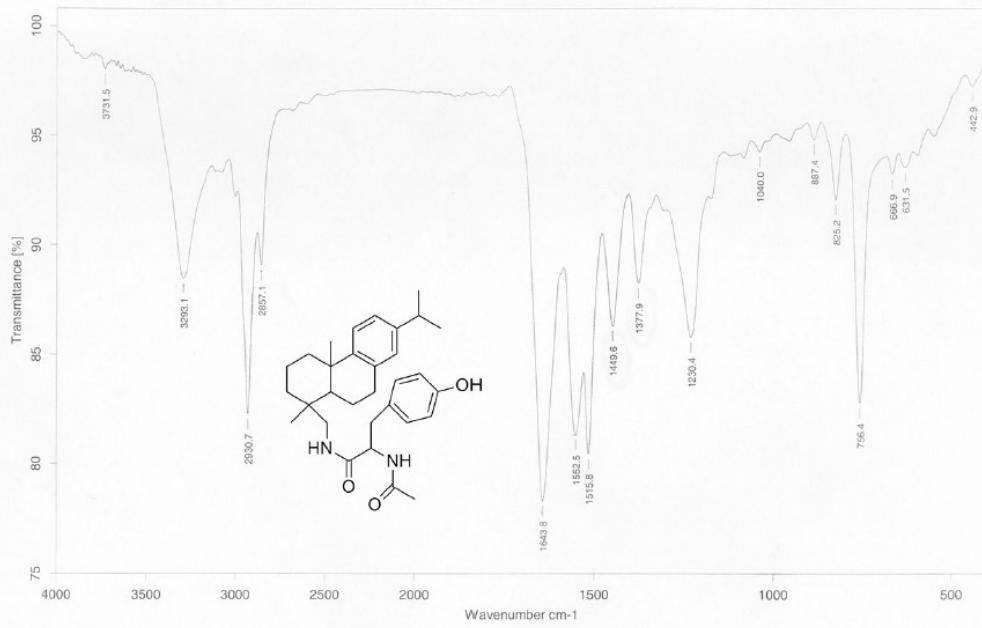

# Compound 4 +TOF MS

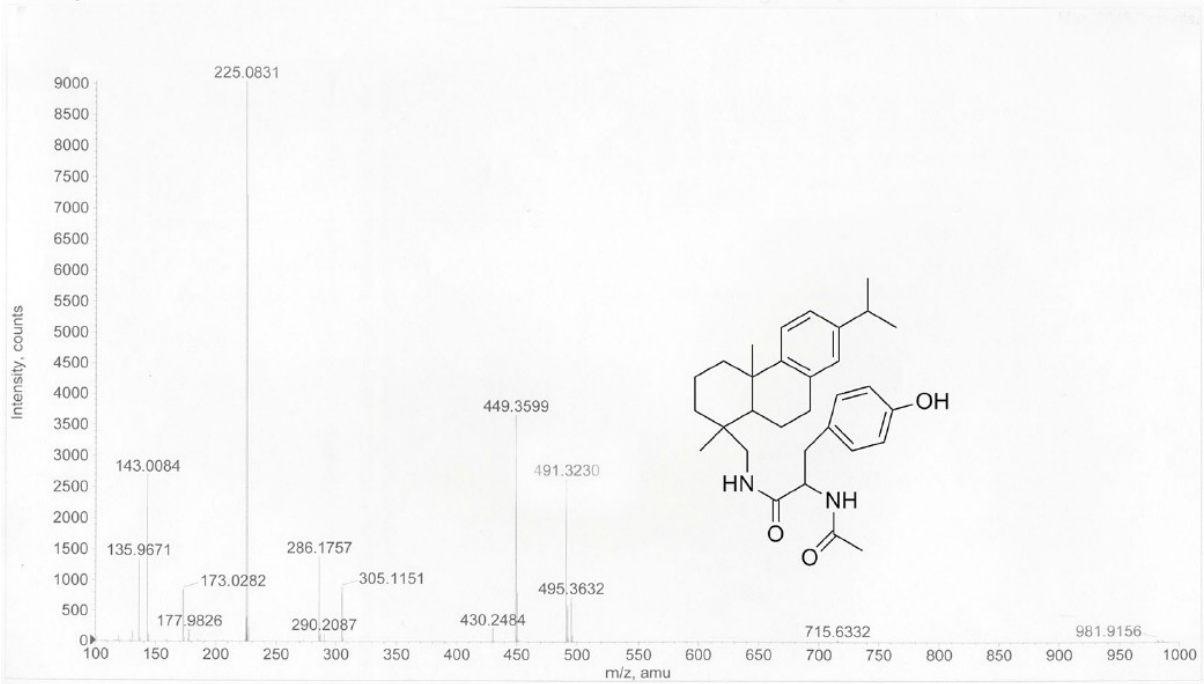

Compound 4 COSY

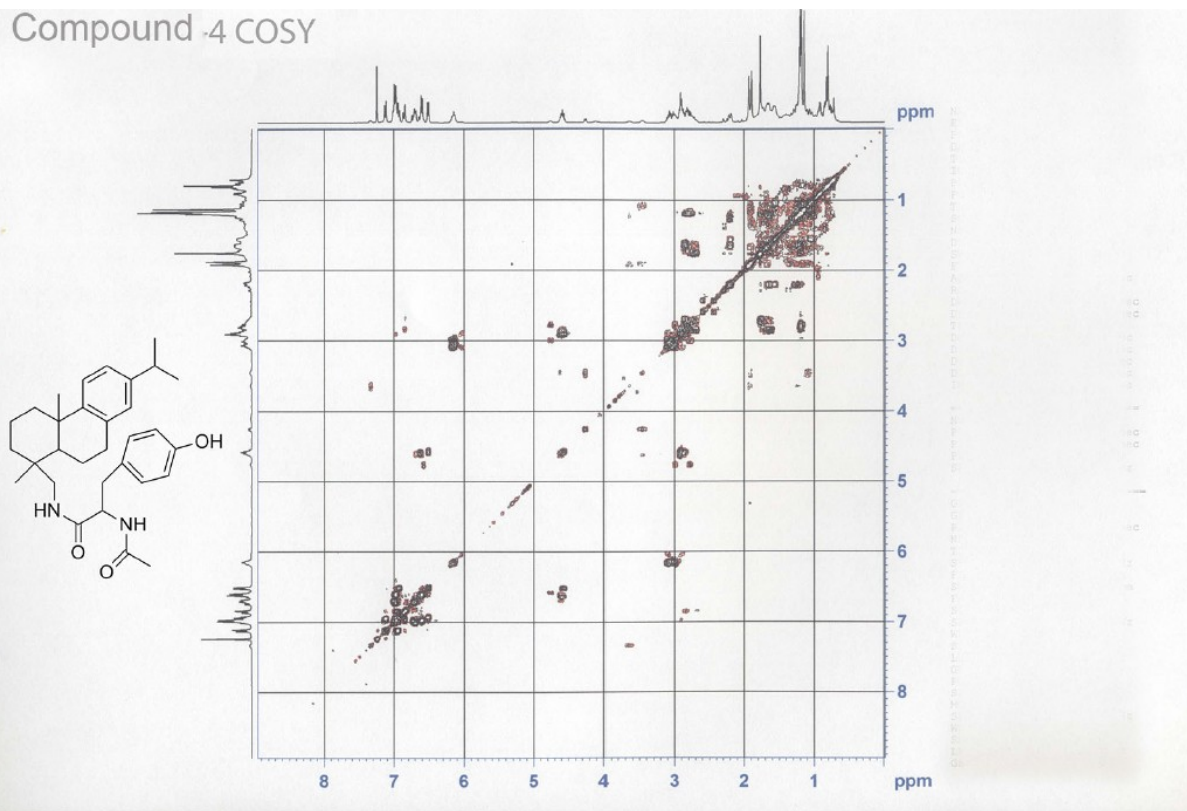

Compound 4 HMBC

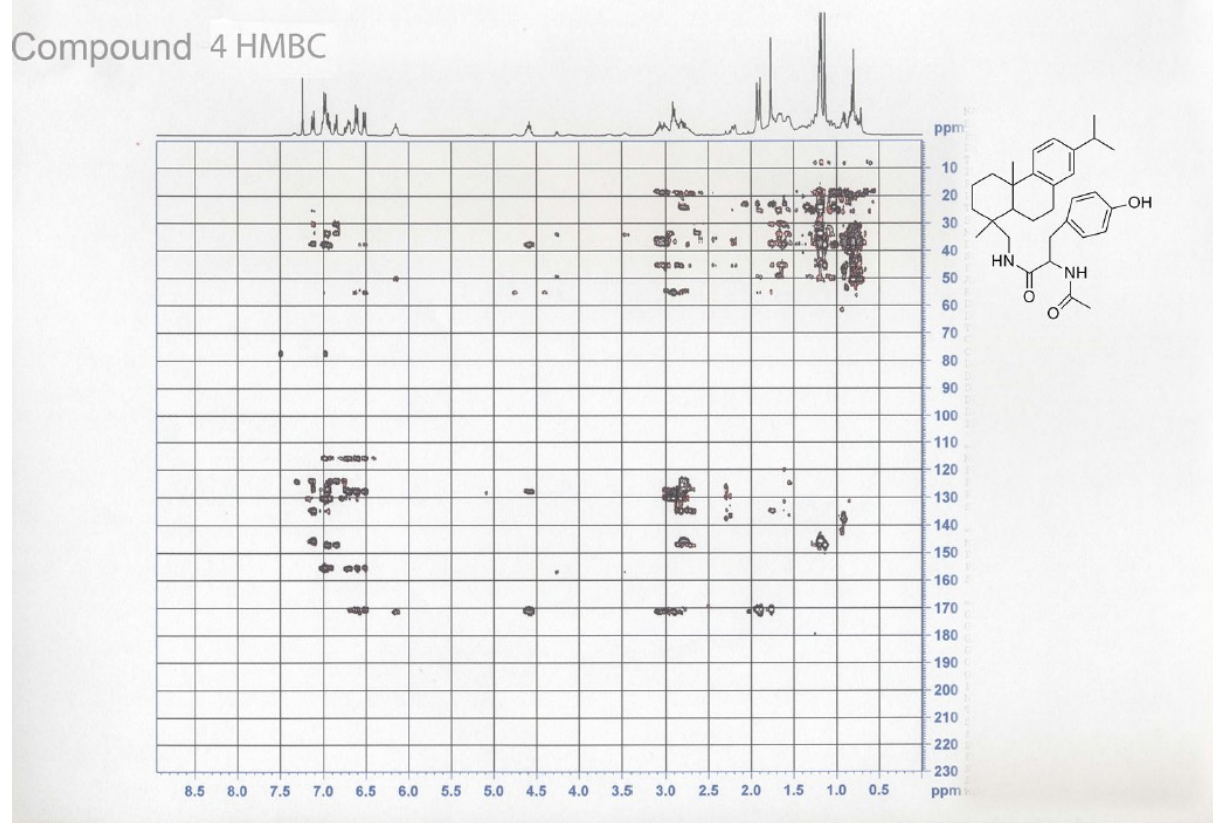

# Compound 4 HSQC

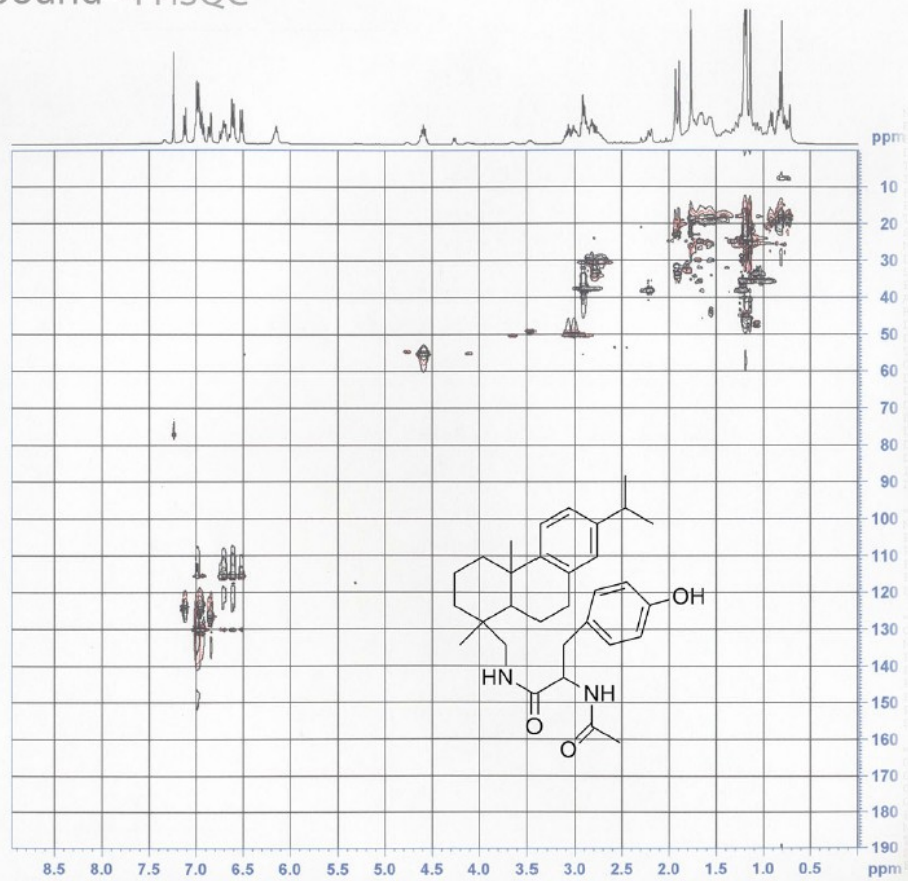

# Compound 4 NOESY

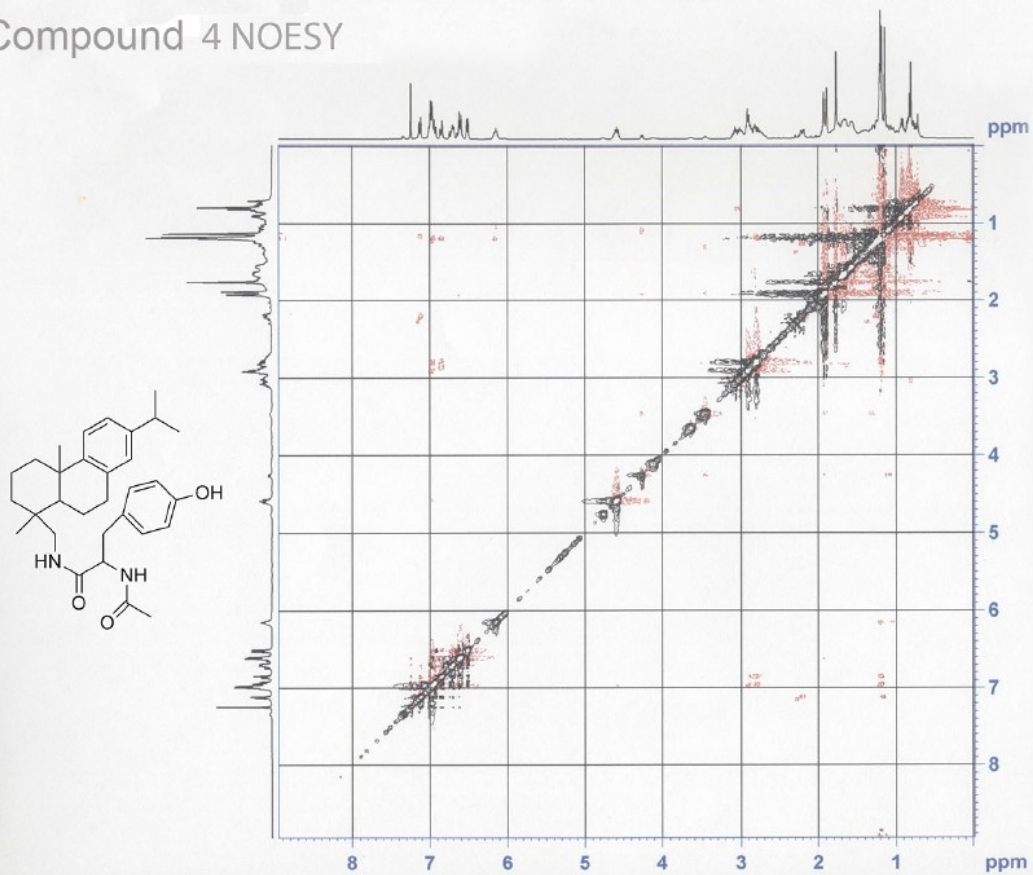

# Compound 5 1H NMR

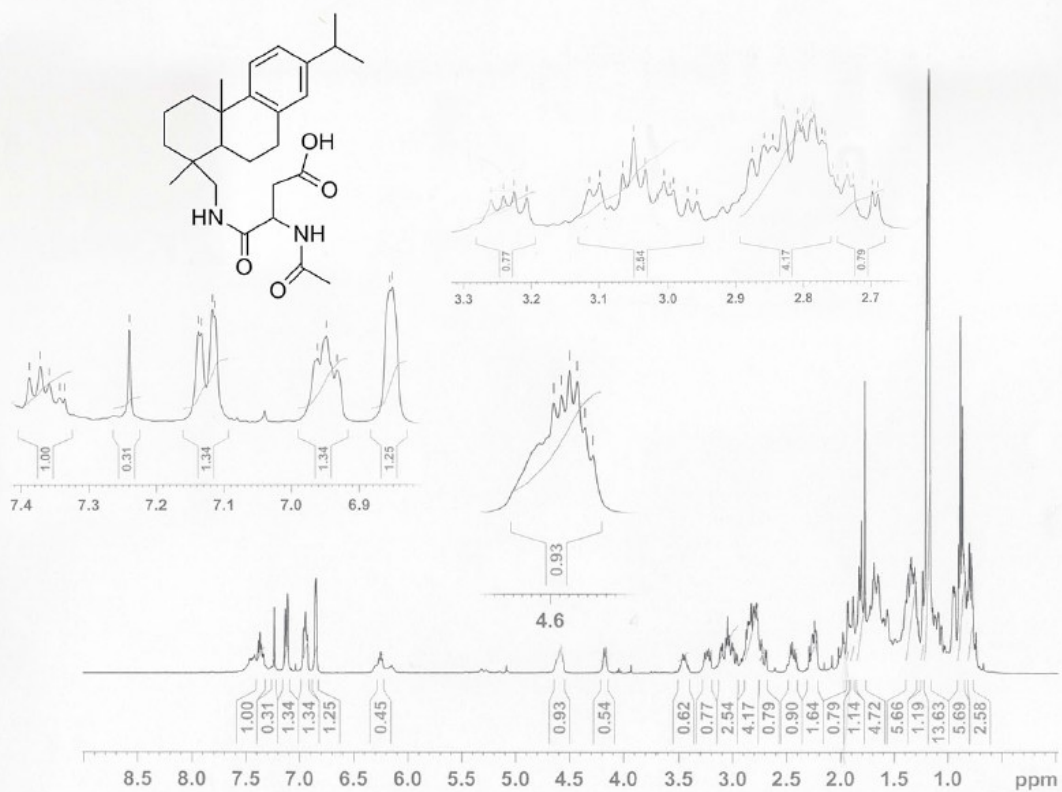

# Compound 5 13C BB

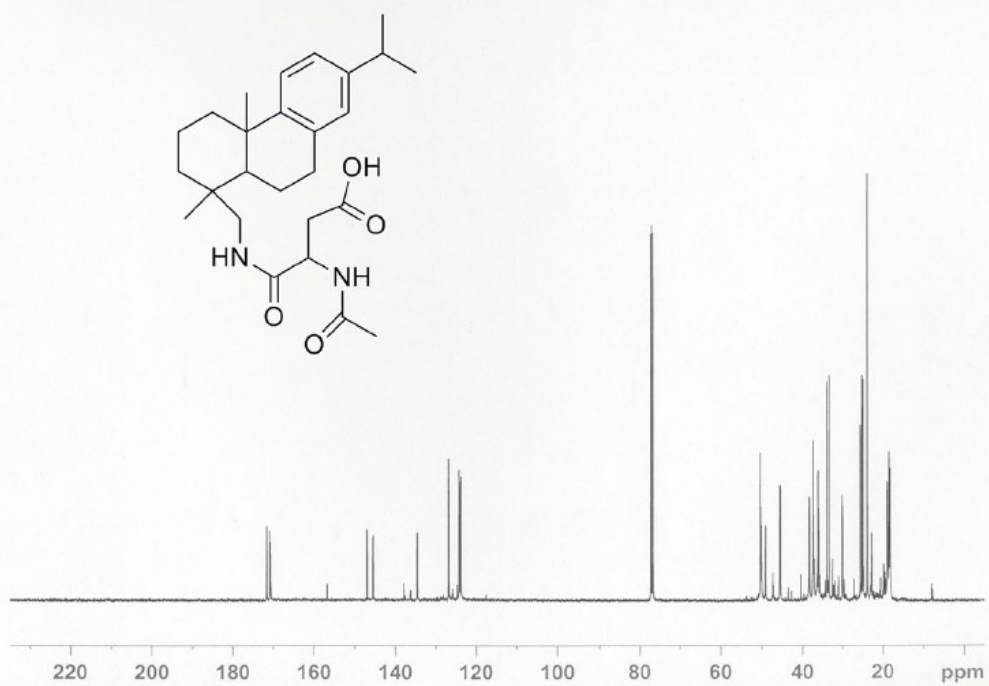

Compound -5 DEPT 90

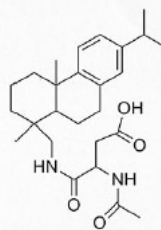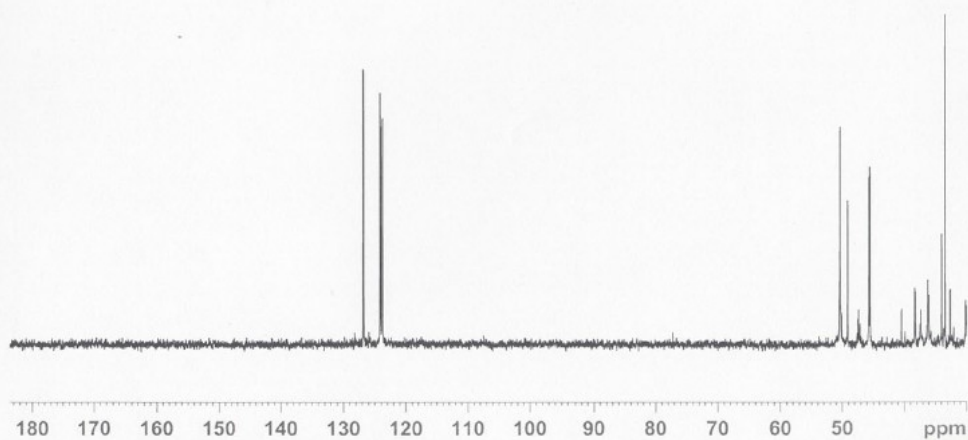

Compound 5 DEPT 135

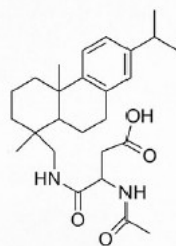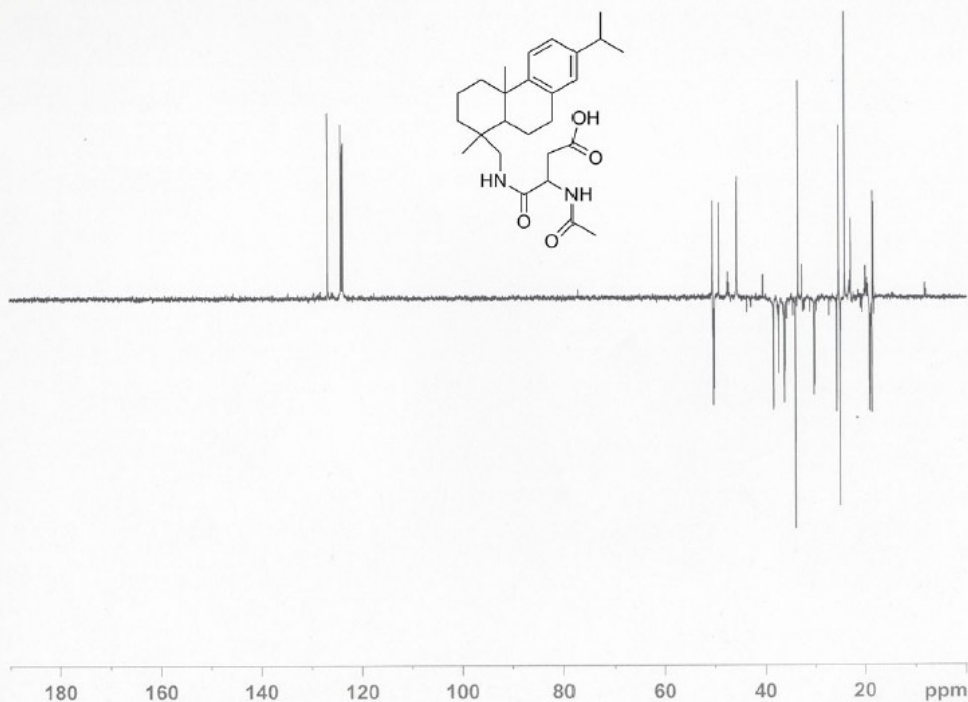

# Compound 5 FTIR

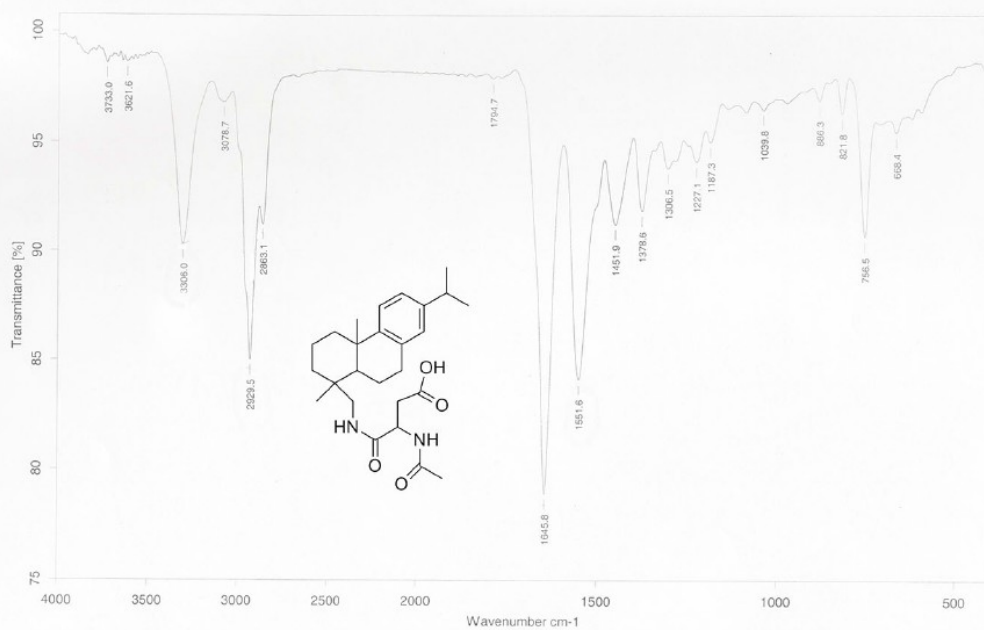

# Compound 5 +TOF MS

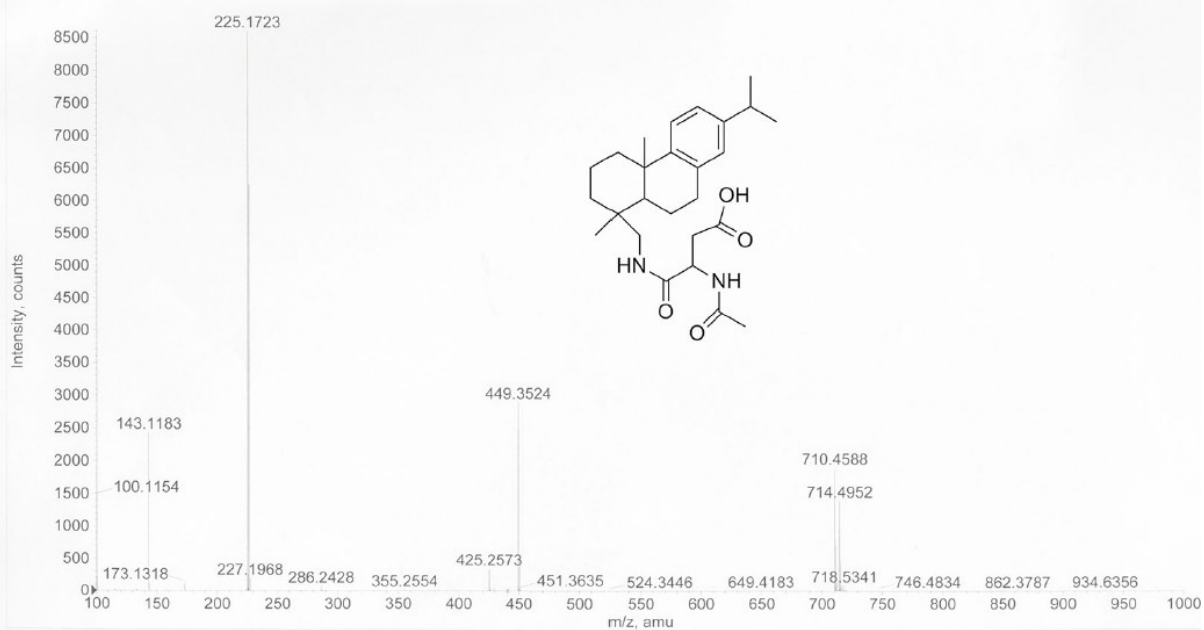



### Compound 5 COSY

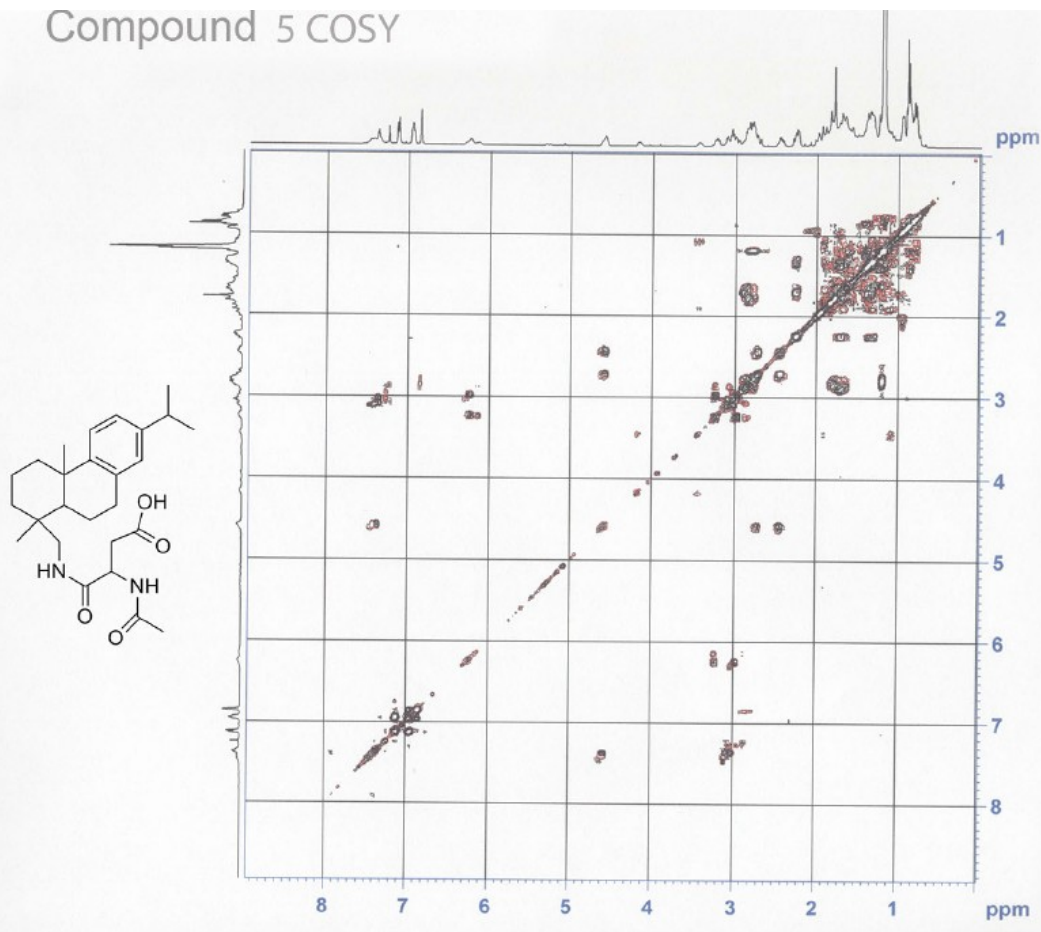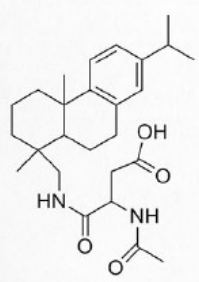

### Compound 5 HMBC

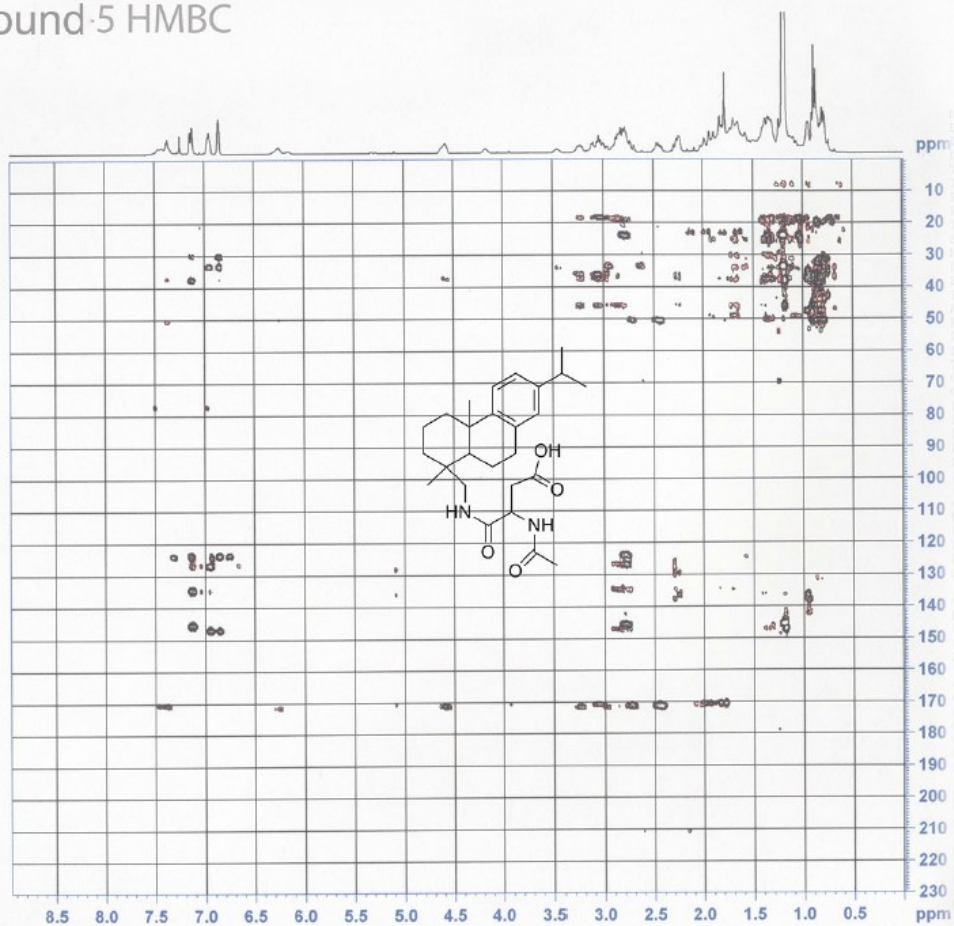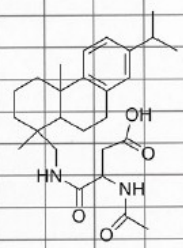

Compound 5 HSQC

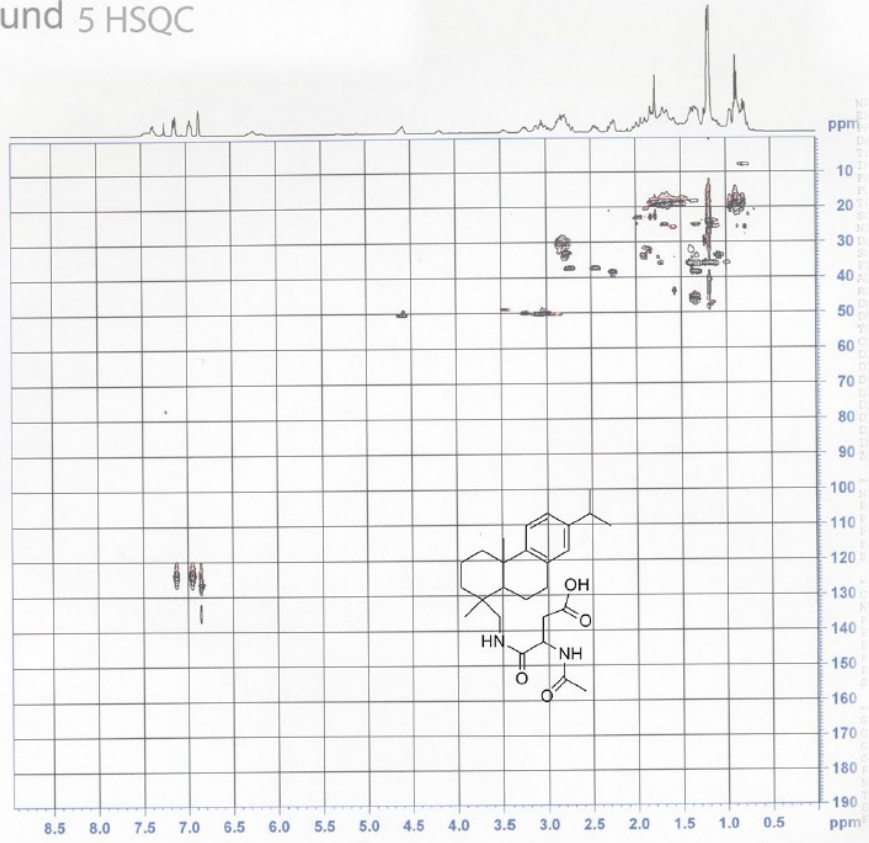

Compound 5 NOESY

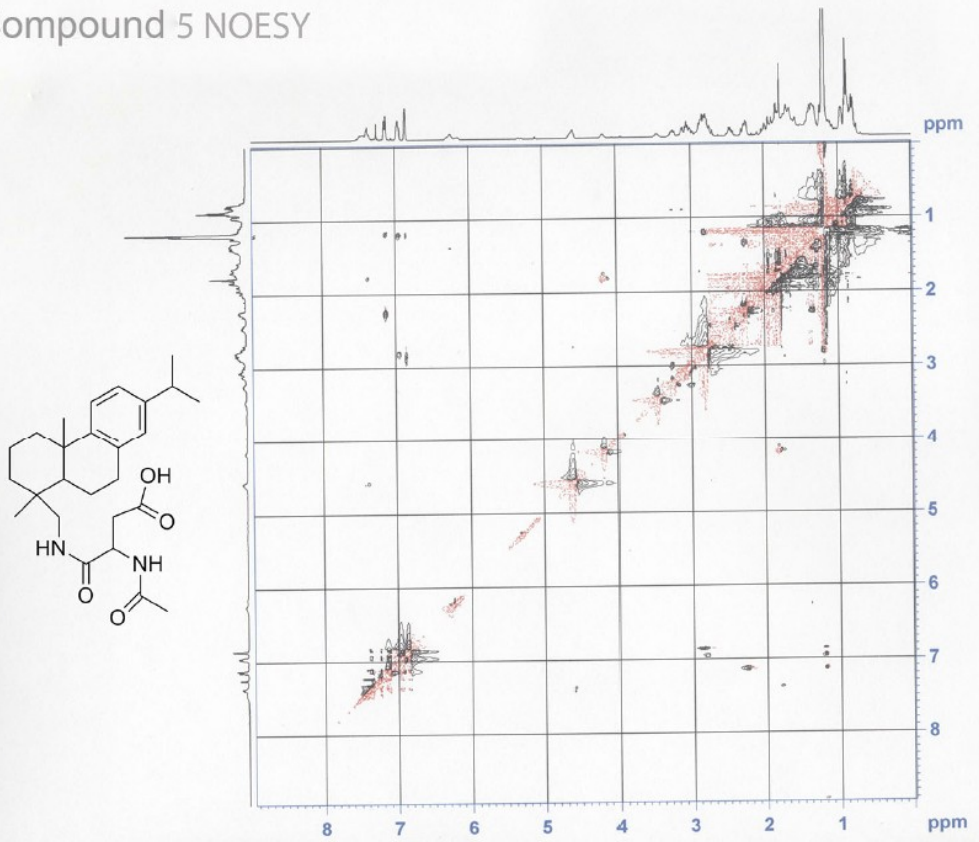

# Compound 6 1H NMR

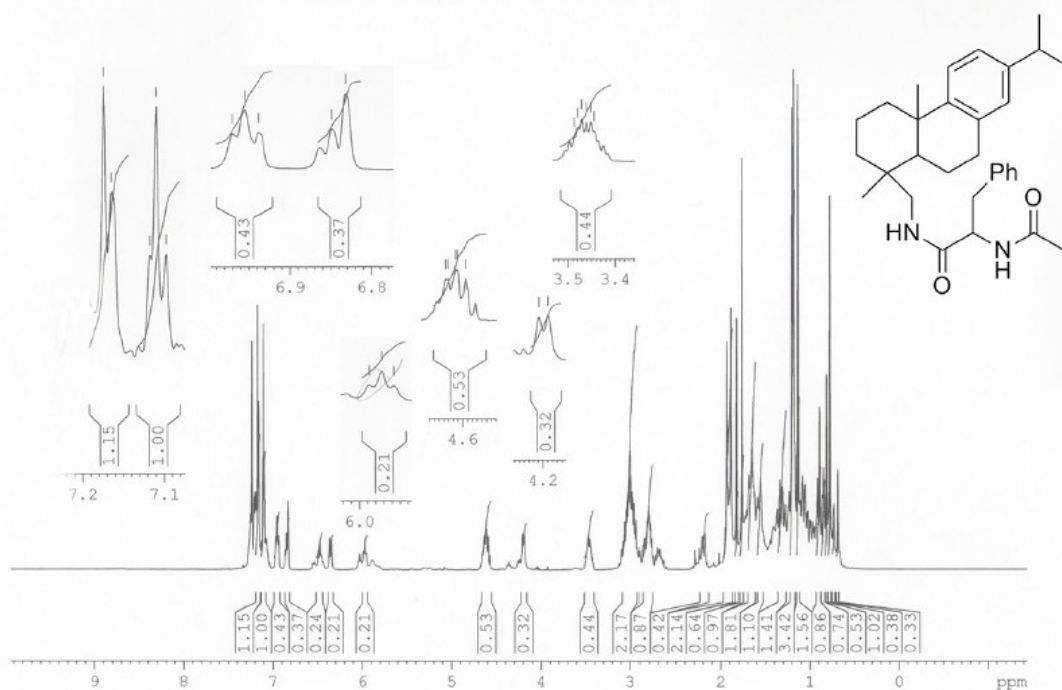

# Compound 6 13C BB

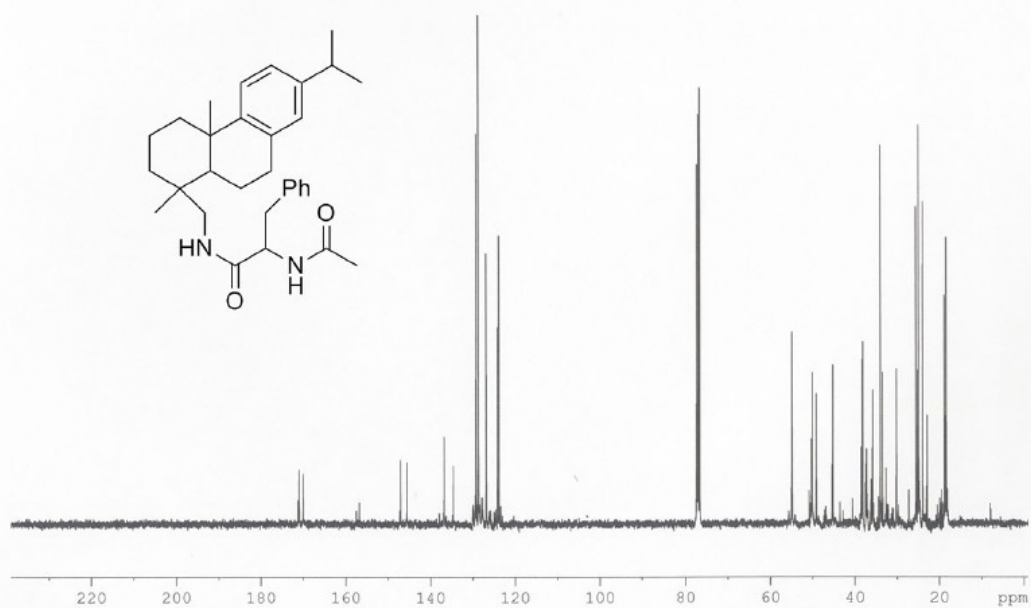



Compound 6 DEPT 90

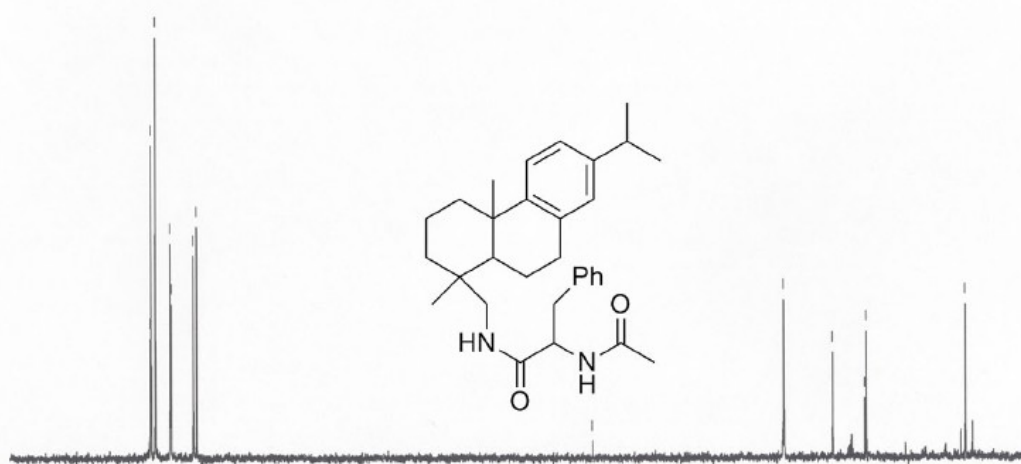

Compound 6 DEPT 135

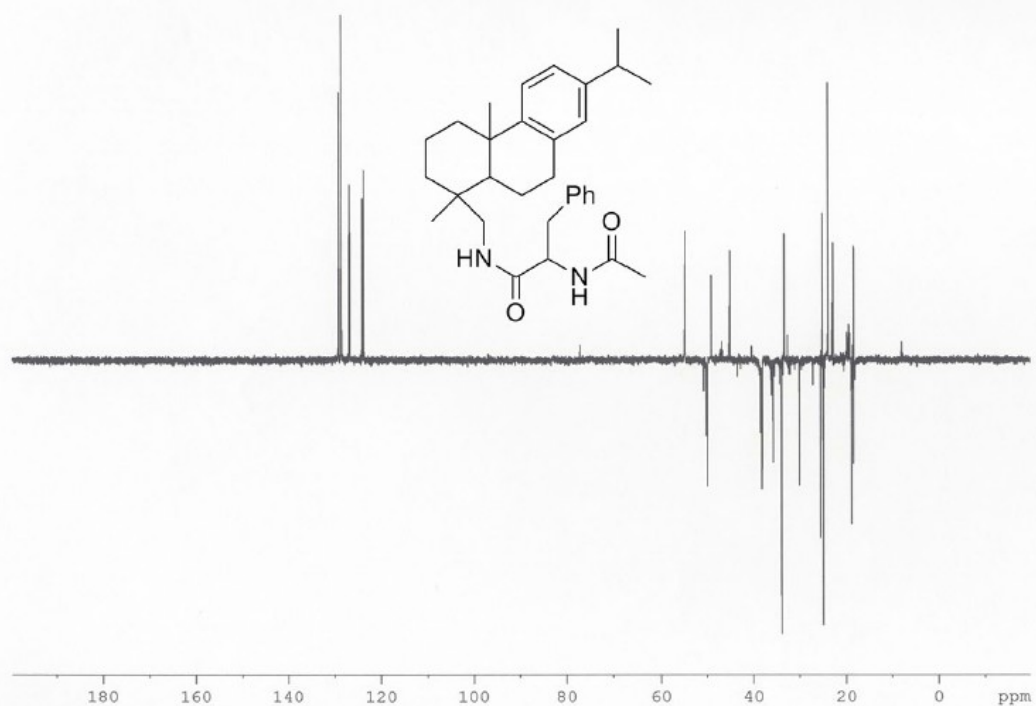

### Compound -6 FTIR

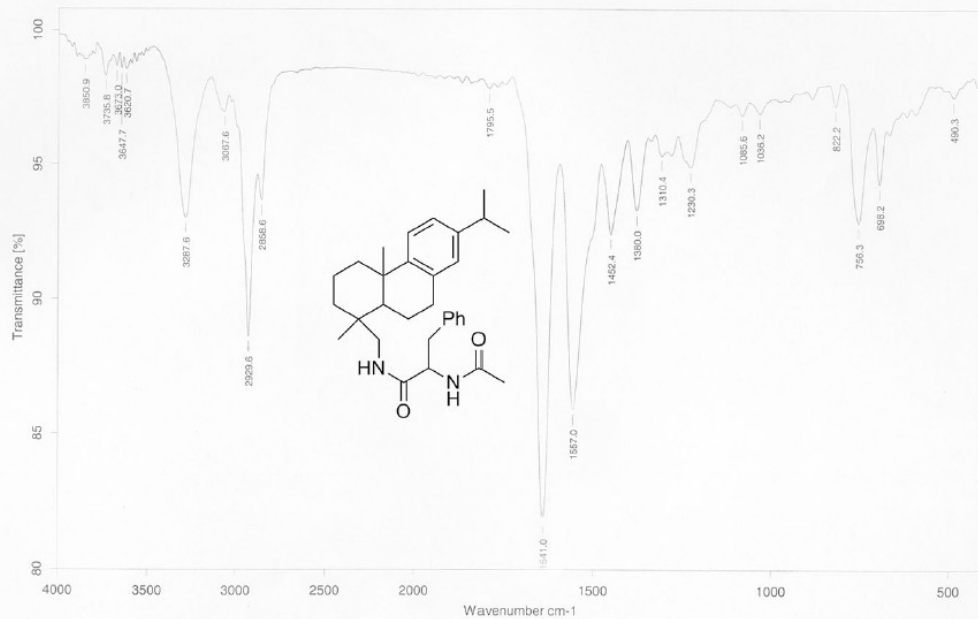

### Compound-6 +TOF MS

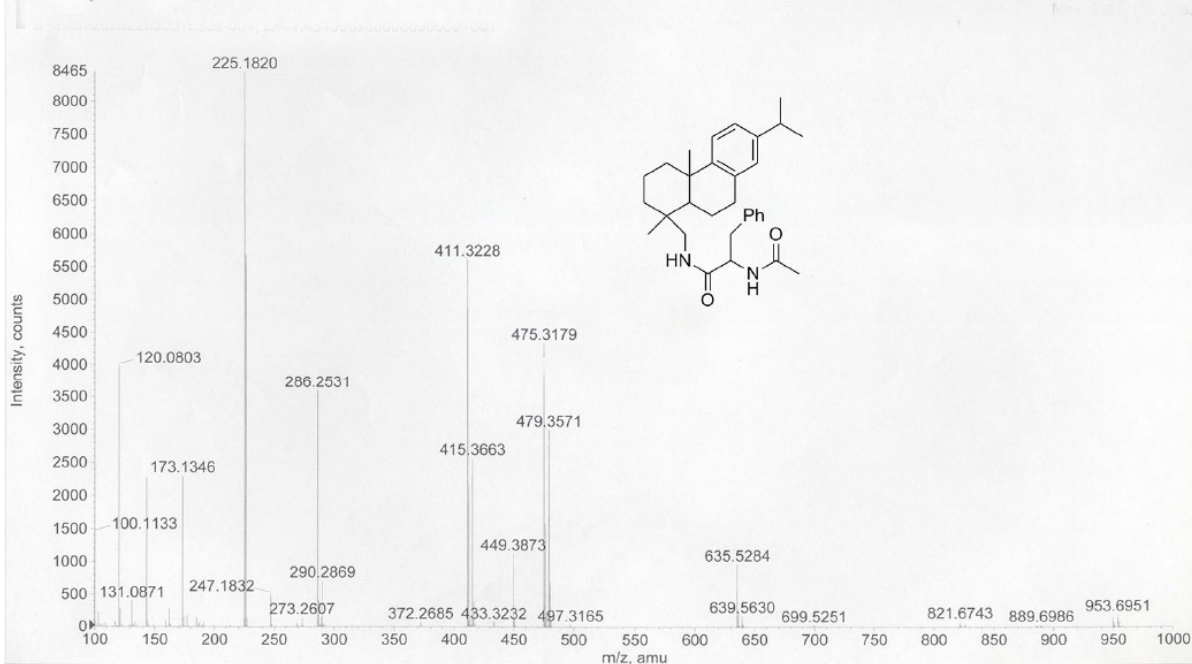

### Compound 6 COSY

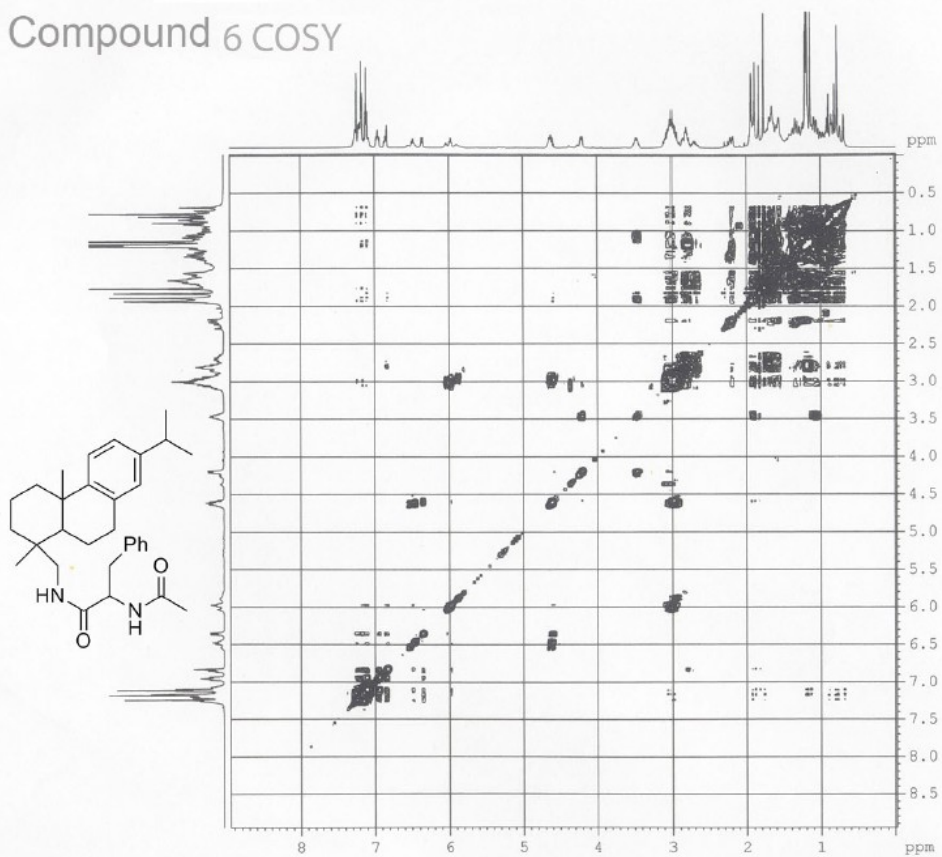

### Compound 6 HMBC

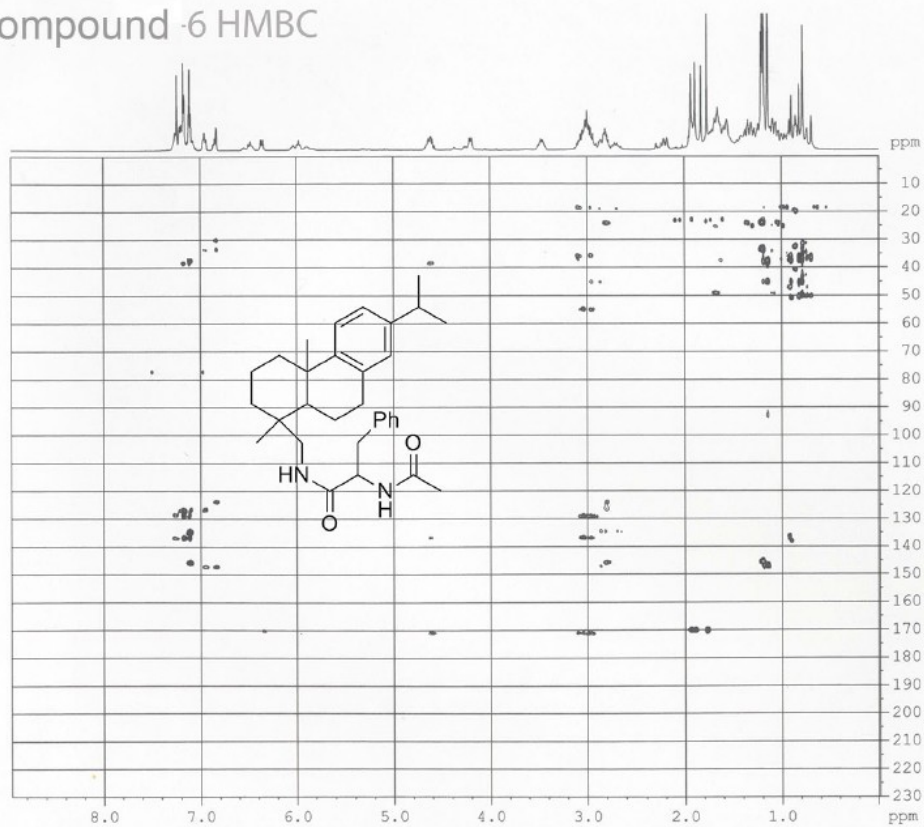

# Compound 6 HSQC

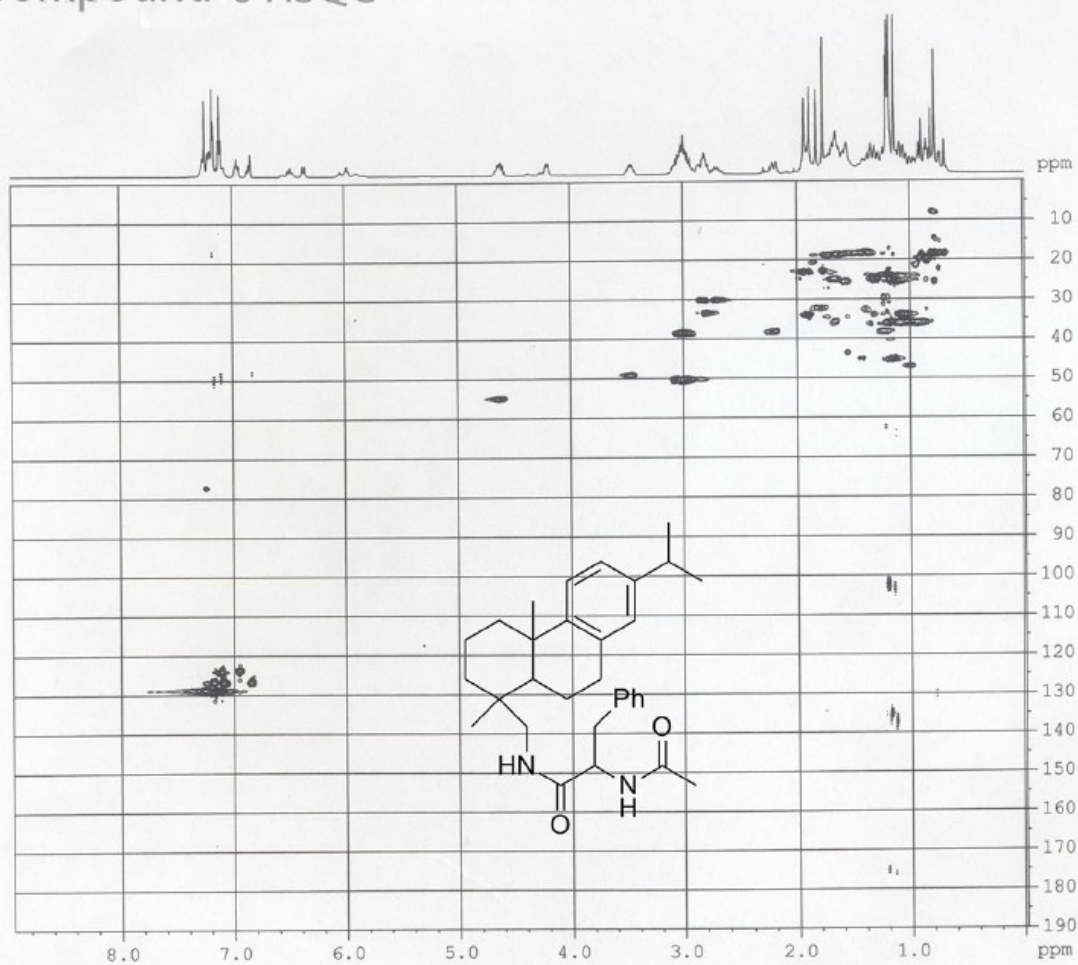

# Compound 6 NOESY

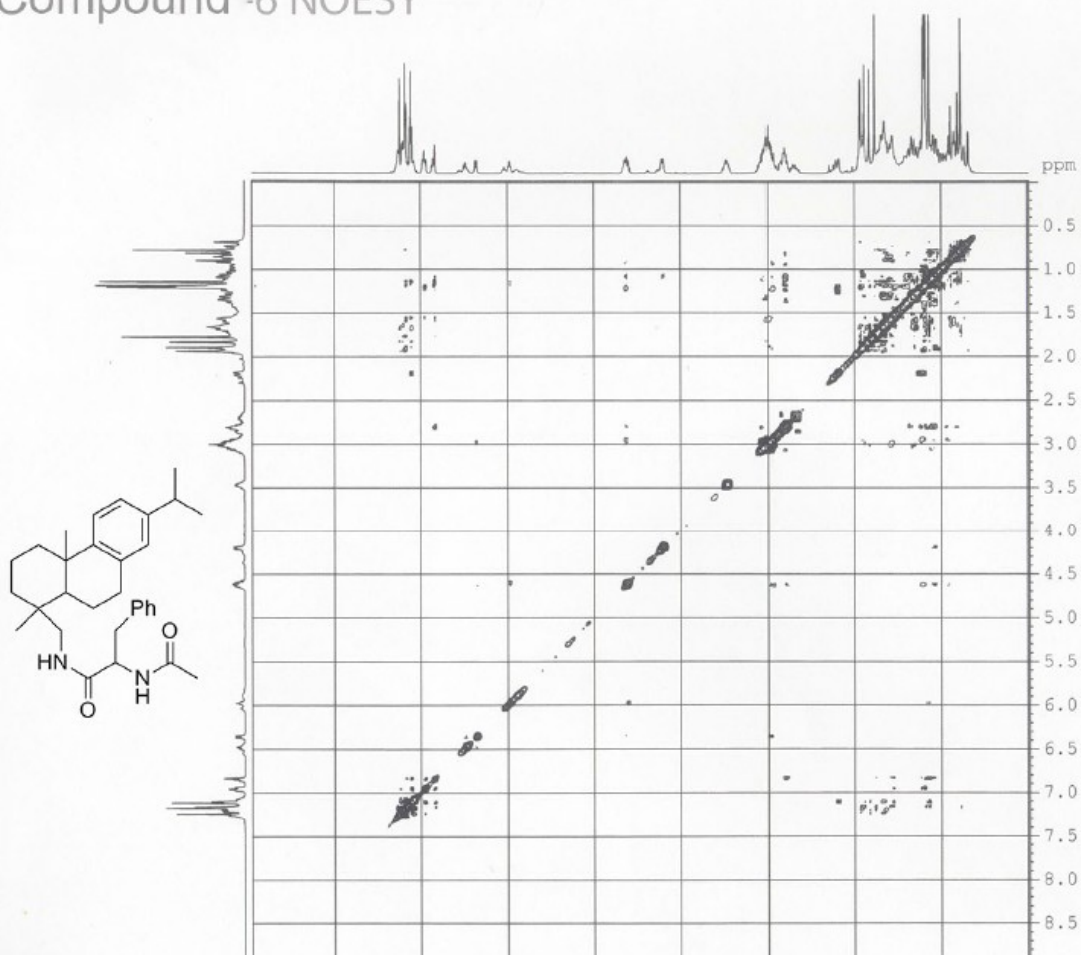



# Compound 7 1H NMR

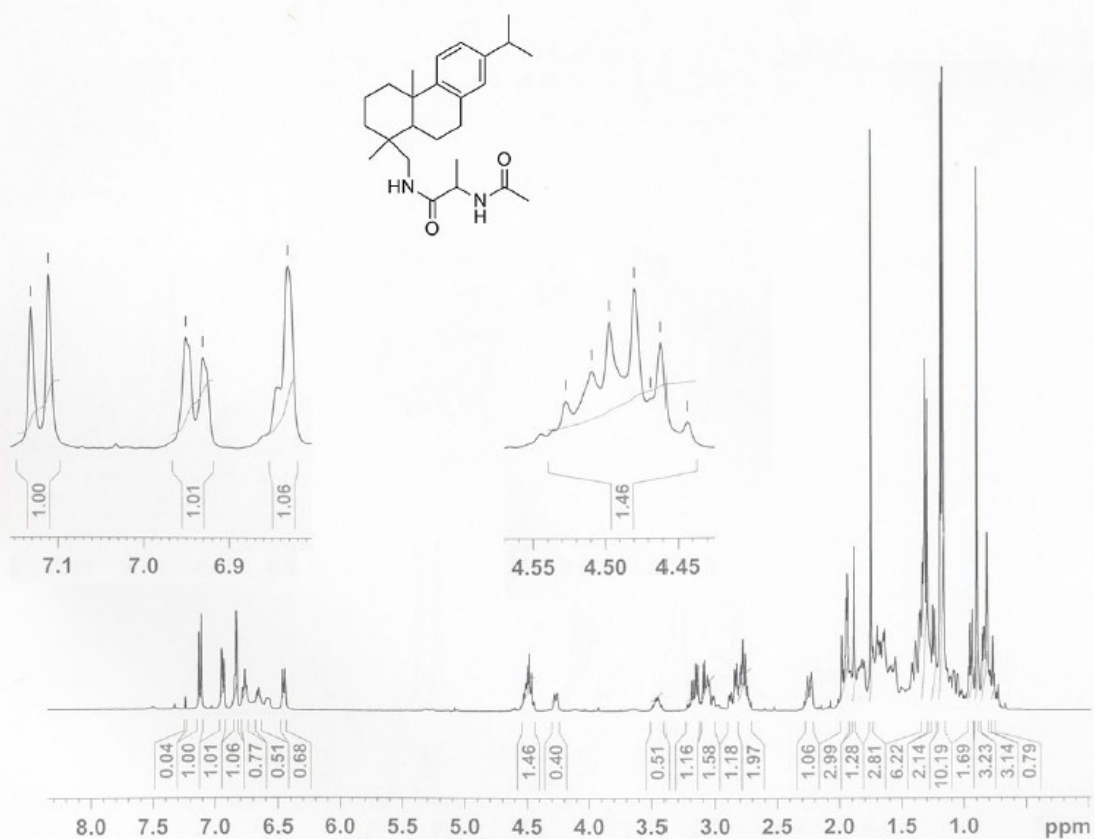

# Compound 7 13C BB

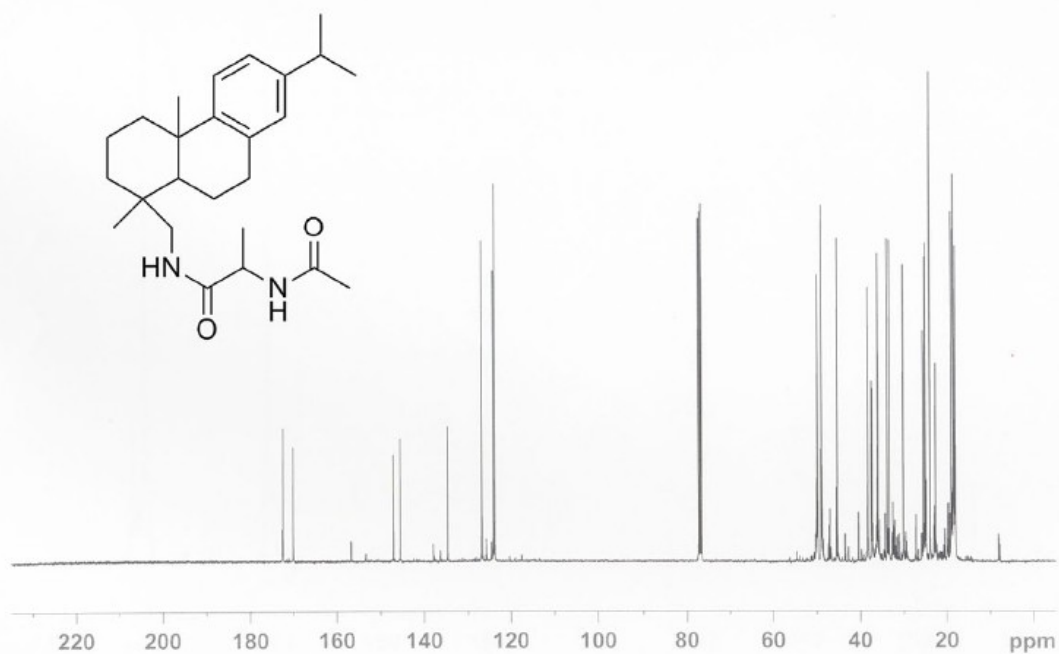

# Compound 7 DEPT 90

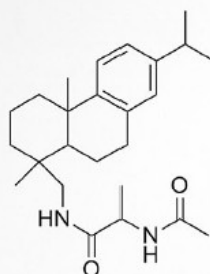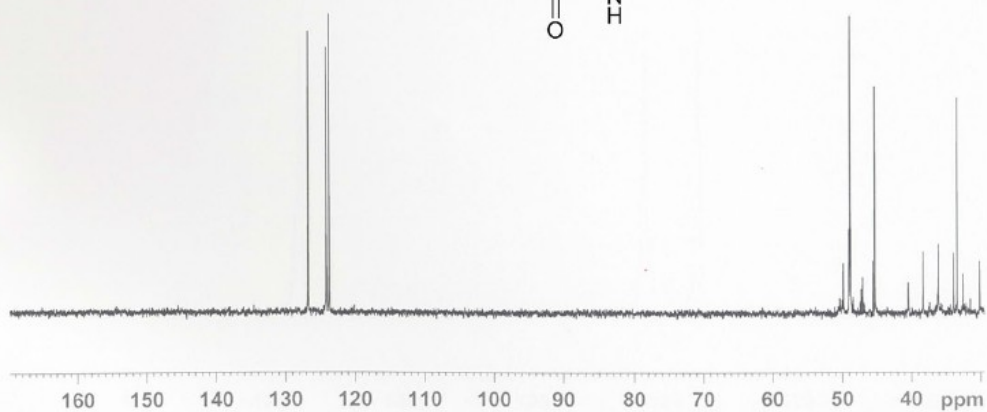

# Compound 7 DEPT 135

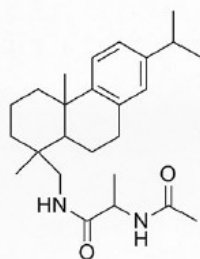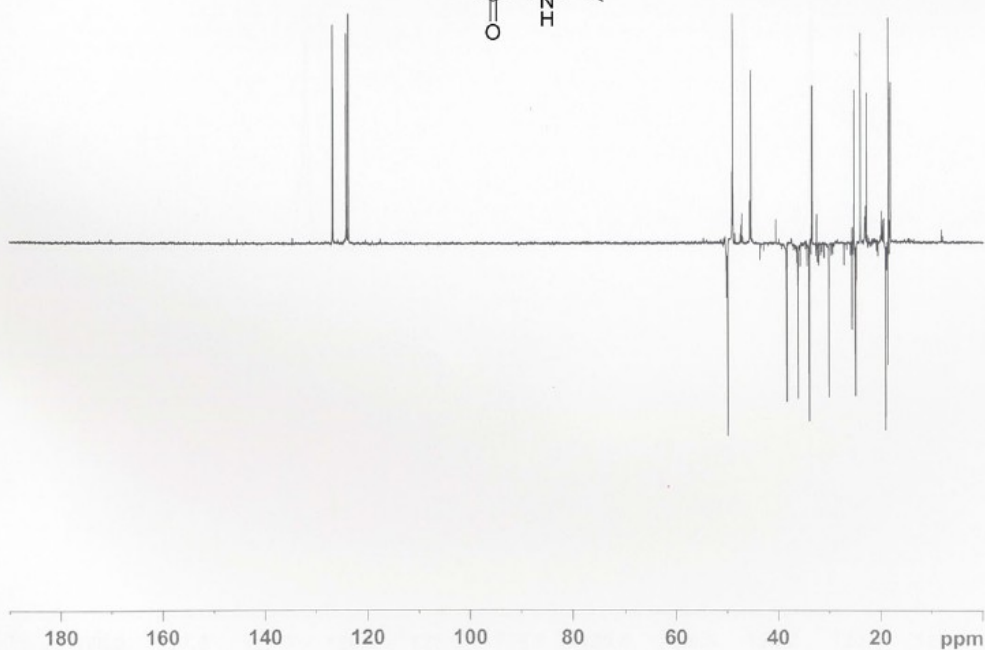

# Compound 7 FTIR

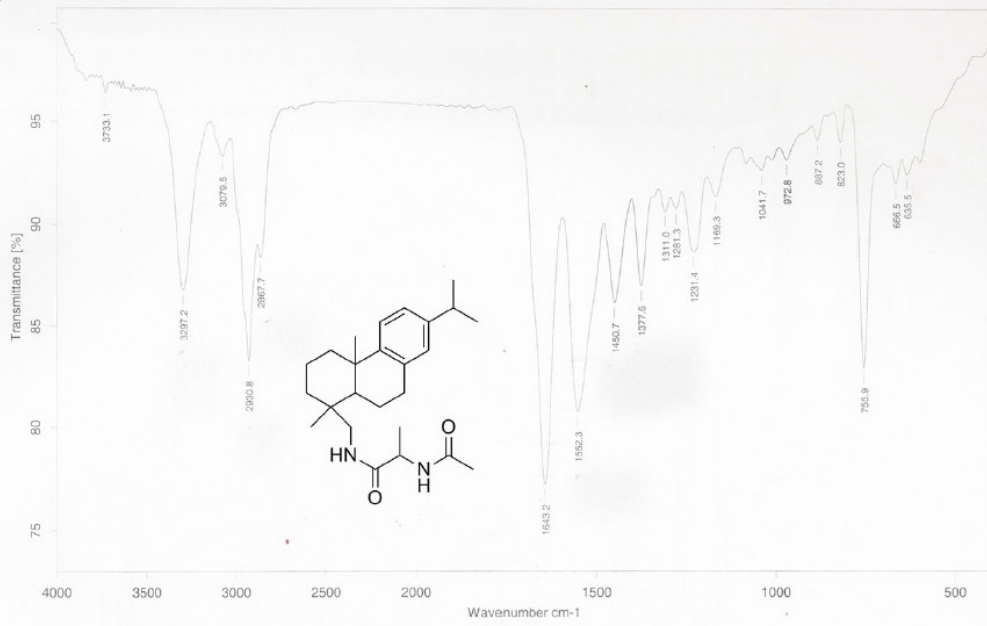

# Compound 7 +TOF MS

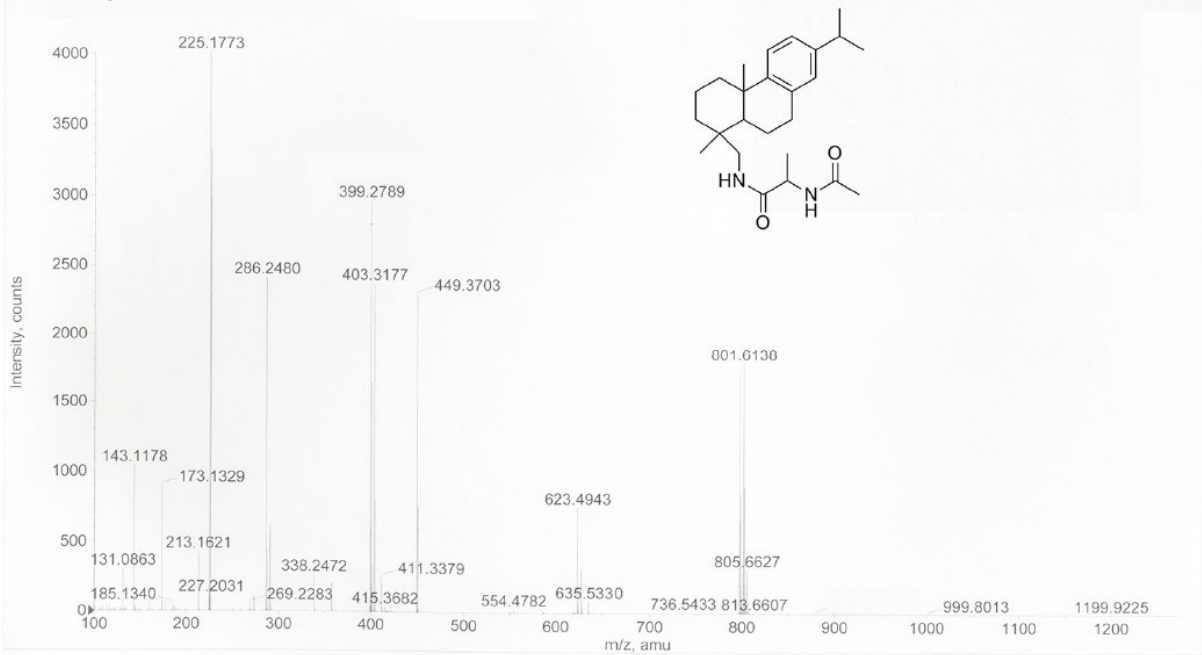

### Compound 7 COSY

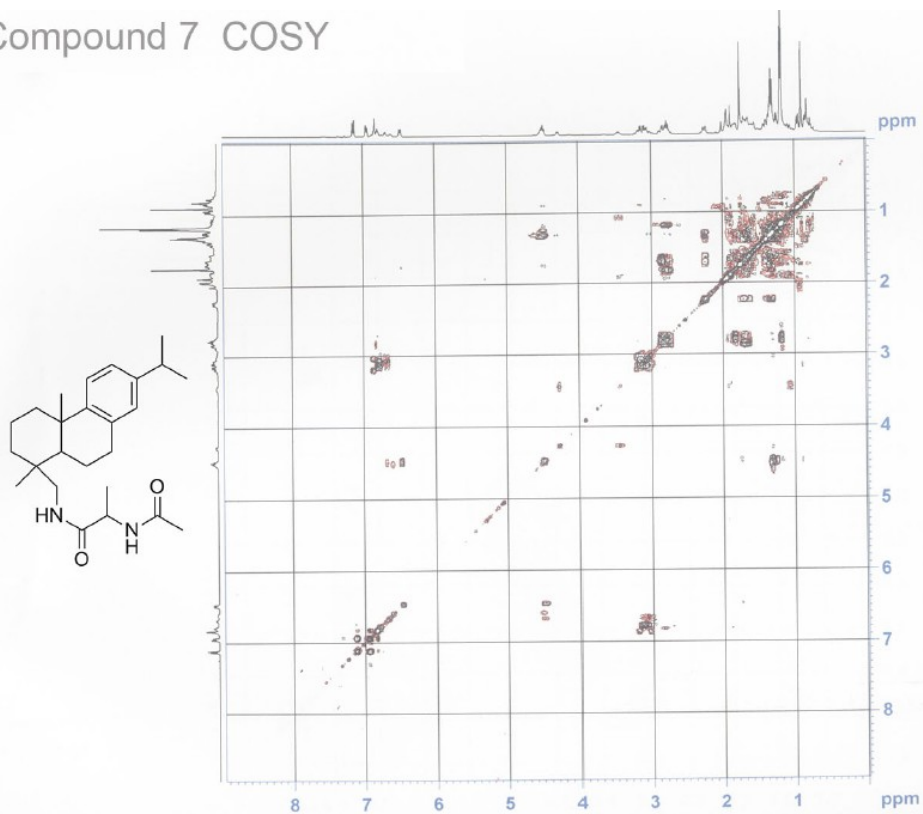

### Compound 7 HMBC

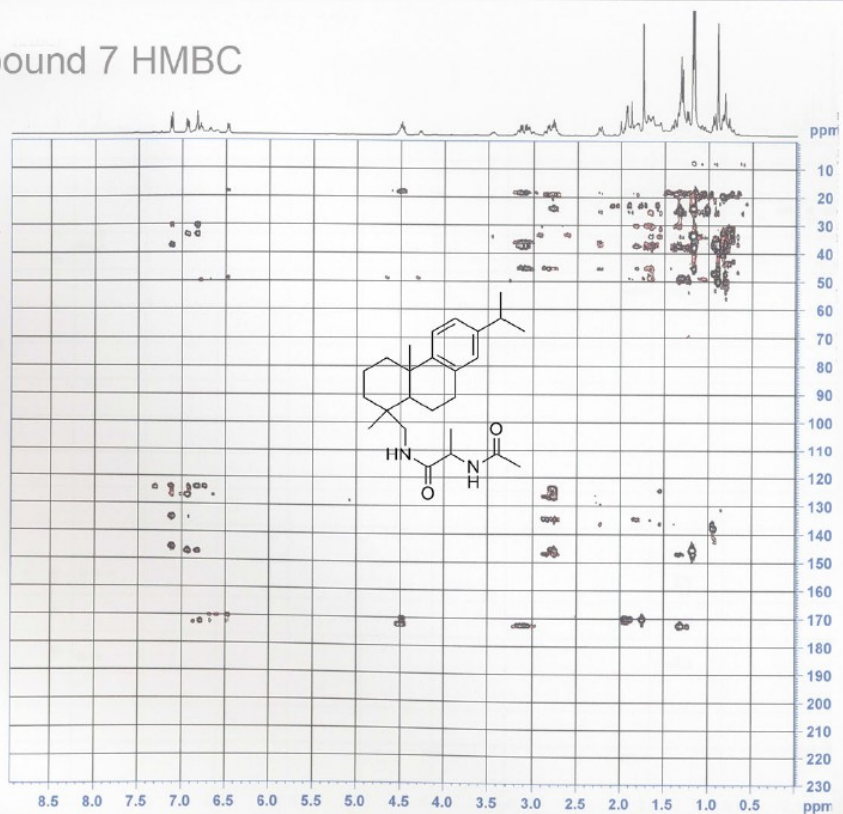

# Compound 7 HSQC

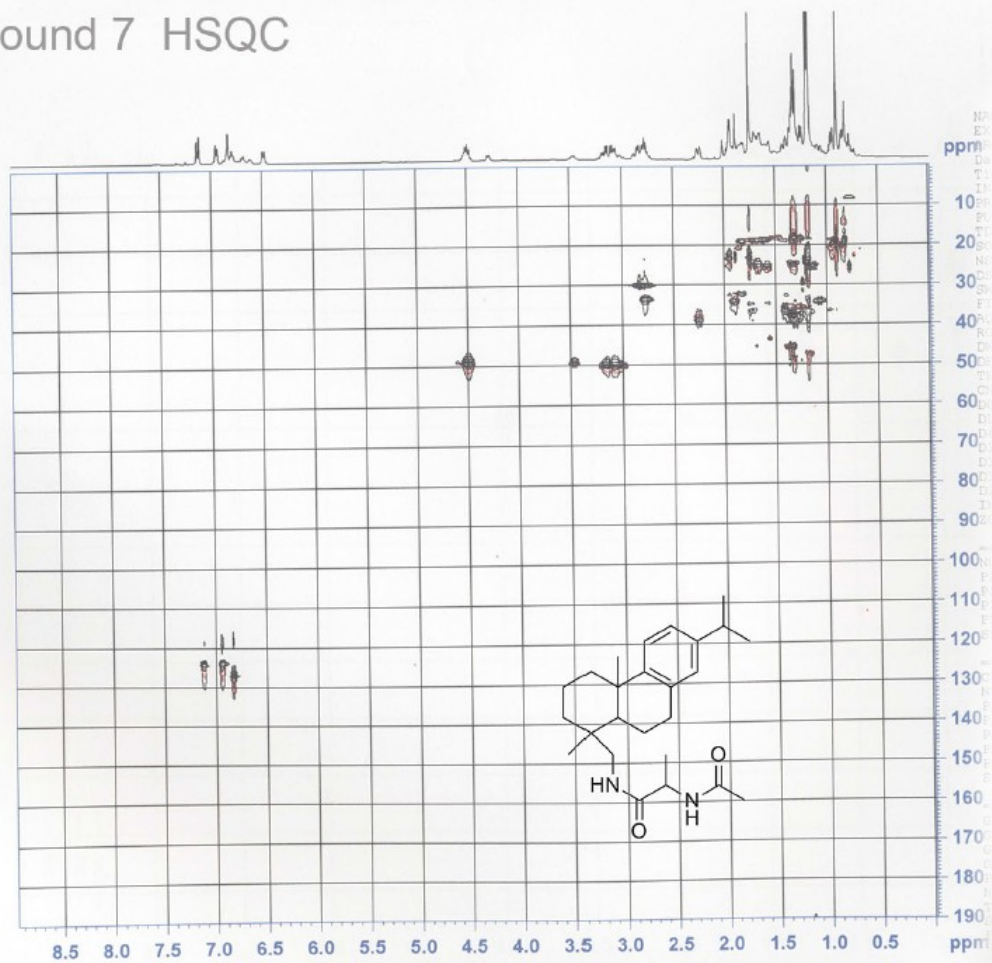

# Compound 7 NOESY

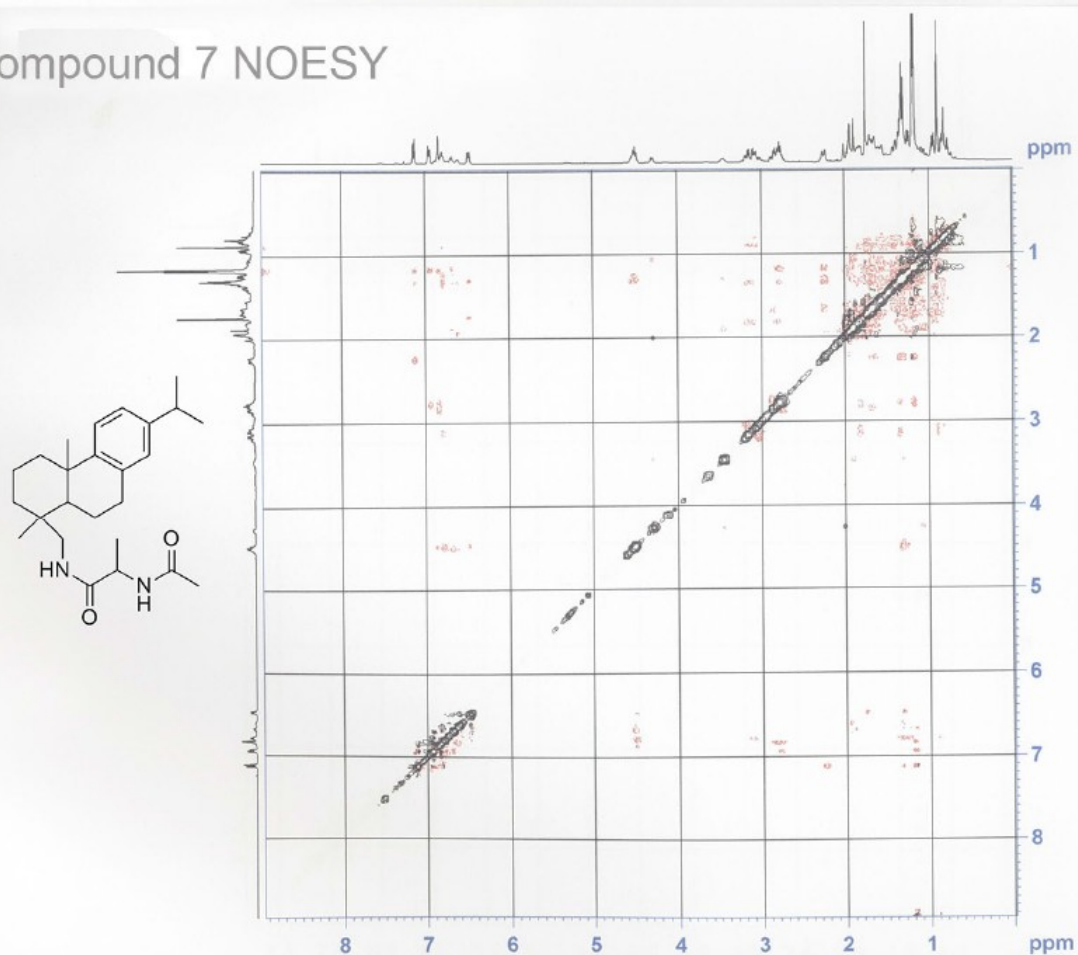

Supplement: MOESM1 [file 11044708]
