# Supplementary material for: Synthesis and bio-molecular study of (+)-N-Acetyl-α-amino acid dehydroabietylamine derivative for the selective therapy of hepatocellular carcinoma
Source: Springer Nature journal article supplement (doi:10.1186/s12885-016-2942-5), 2016-11-14
Supplement: MOESM3 [file 11044708]

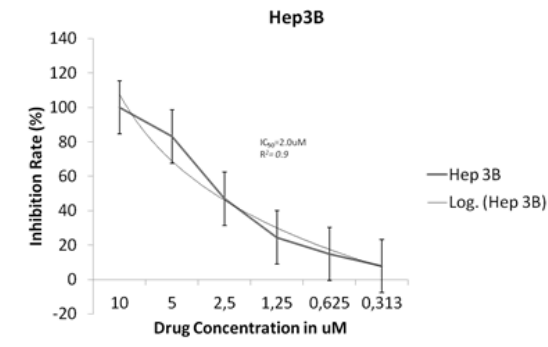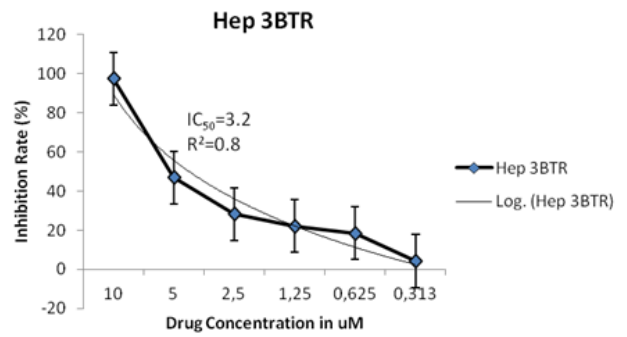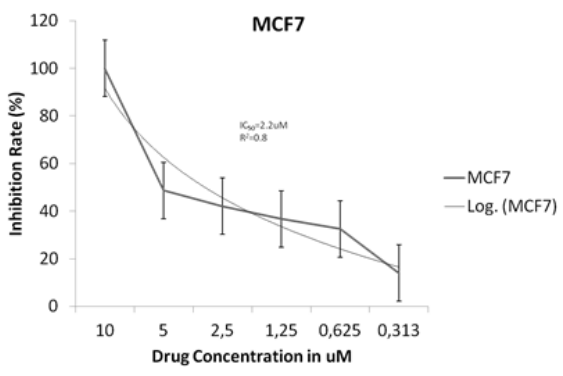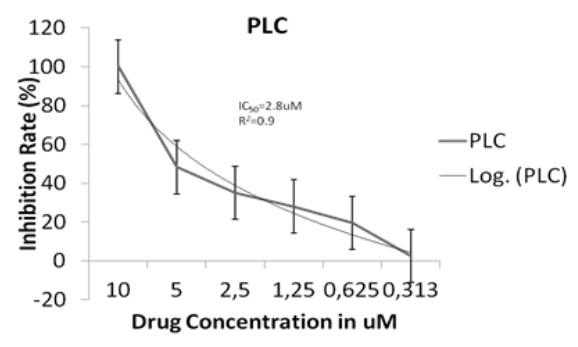

**Figure S1 Inhibition Curves against DAAD-2**
