# Supplementary material for: Synthesis and bio-molecular study of (+)-N-Acetyl-α-amino acid dehydroabietylamine derivative for the selective therapy of hepatocellular carcinoma
Source: Springer Nature journal article supplement (doi:10.1186/s12885-016-2942-5), 2016-11-14
Supplement: MOESM6 [file 11044708]

total instances: 6100, signature: SNU449\_Drug-Control, export: Excel

permuted results | isolate shaded

| barview | rank | batch ▲▼ | cmap name ▲▼                   | dose  | cell | score ▲▼ | up ▲▼ | down ▲▼ | ATC     | Instance_Id |
|---------|------|----------|--------------------------------|-------|------|----------|-------|---------|---------|-------------|
|         | 6082 | 670      | merbromin                      | 5 µM  | MCF7 | -.833    | -.107 | .282    |         | 3439        |
|         | 6083 | 767      | estradiol                      | 10 nM | MCF7 | -.833    | -.152 | .237    | G03CA03 | 6957        |
|         | 6084 | 771      | diethylcarbamazine             | 10 µM | MCF7 | -.835    | -.082 | .308    | P02CB02 | 7425        |
|         | 6085 | 630      | 3-hydroxy-DL-kynurenine        | 18 µM | HL60 | -.837    | -.208 | .184    |         | 1300        |
|         | 6086 | 665      | betulin                        | 9 µM  | HL60 | -.838    | -.221 | .170    |         | 2952        |
|         | 6087 | 649      | atractyloside                  | 5 µM  | HL60 | -.848    | -.146 | .251    |         | 2573        |
|         | 6088 | 771      | enalapril                      | 8 µM  | MCF7 | -.852    | -.105 | .293    | C09AA02 | 7428        |
|         | 6089 | 665      | proguanil                      | 14 µM | HL60 | -.854    | -.176 | .223    | P01BB01 | 2944        |
|         | 6090 | 747      | streptozocin                   | 15 µM | MCF7 | -.857    | -.104 | .296    | L01AD04 | 7193        |
|         | 6091 | 627      | homatropine                    | 11 µM | MCF7 | -.866    | -.104 | .301    | S01FA05 | 1684        |
|         | 6092 | 665      | levopropoxyphene               | 7 µM  | HL60 | -.870    | -.182 | .225    |         | 2980        |
|         | 6093 | 513      | rosiglitazone                  | 10 µM | MCF7 | -.880    | -.110 | .301    | A10BG02 | 1071        |
|         | 6094 | 631      | chlorogenic acid               | 11 µM | HL60 | -.886    | -.158 | .257    |         | 1346        |
|         | 6095 | 631      | dl-alpha tocopherol            | 9 µM  | HL60 | -.887    | -.167 | .247    |         | 1320        |
|         | 6096 | 665      | lansoprazole                   | 11 µM | HL60 | -.908    | -.241 | .184    | A02BC03 | 2967        |
|         | 6097 | 771      | dimenhydrinate                 | 9 µM  | MCF7 | -.913    | -.115 | .312    |         | 7431        |
|         | 6098 | 648      | streptozocin                   | 15 µM | HL60 | -.931    | -.204 | .231    | L01AD04 | 2535        |
|         | 6099 | 665      | cyclic adenosine monophosphate | 12 µM | HL60 | -.978    | -.207 | .250    |         | 2969        |
|         | 6100 | 764      | vinburnine                     | 14 µM | PC3  | -1       | -.120 | .348    | C04AX17 | 7154        |

Figure S3: Connectivity map of DAAD2 treated SNU449 cells
