# Supplementary material for: Synthesis and bio-molecular study of (+)-N-Acetyl-α-amino acid dehydroabietylamine derivative for the selective therapy of hepatocellular carcinoma
Source: Springer Nature journal article supplement (doi:10.1186/s12885-016-2942-5), 2016-11-14
Supplement: MOESM7 [file 11044708]

total instances: 6100, signature: HEP3B\_Drug-Control\_List, export: Excel

permuted results | isolate shaded

| barview | rank | batch ▲▼           | cmap name ▲▼ | dose | cell | score ▲▼ | up ▲▼ | down ▲▼         | ATC  | Instance_id |
|---------|------|--------------------|--------------|------|------|----------|-------|-----------------|------|-------------|
| 1       | 771  | diethylcarbamazine | 10 μM        | MCF7 | 1    | .161     | -.606 | P02CB02         | 7425 |             |
| 2       | 720  | spiradoline        | 1 μM         | MCF7 | .940 | .174     | -.547 |                 | 4375 |             |
| 3       | 688  | brompheniramine    | 9 μM         | PC3  | .938 | .235     | -.485 | R06AB01         | 4013 |             |
| 4       | 764  | vinburnine         | 14 μM        | PC3  | .925 | .266     | -.444 | C04AX17         | 7154 |             |
| 5       | 680  | levomepromazine    | 9 μM         | PC3  | .925 | .179     | -.530 | N05AA02         | 3701 |             |
| 6       | 632  | cimetidine         | 16 μM        | MCF7 | .913 | .155     | -.546 | A02BA01         | 1464 |             |
| 7       | 761  | adiphenine         | 11 μM        | PC3  | .904 | .193     | -.500 |                 | 7279 |             |
| 8       | 731  | racecadotril       | 10 μM        | PC3  | .899 | .256     | -.433 | A07XA04         | 5755 |             |
| 9       | 681  | myosmine           | 27 μM        | PC3  | .894 | .227     | -.459 |                 | 3737 |             |
| 10      | 735  | vigabatrin         | 31 μM        | MCF7 | .893 | .217     | -.468 | N03AG04         | 5415 |             |
| 11      | 661  | isometheptene      | 8 μM         | HL60 | .892 | .119     | -.565 | A03AX10         | 3145 |             |
| 12      | 734  | gentamicin         | 3 μM         | PC3  | .887 | .175     | -.505 | J D S S S       | 5883 |             |
| 13      | 616  | midodrine          | 14 μM        | PC3  | .879 | .201     | -.473 | C01CA17         | 2087 |             |
| 14      | 628  | diphenhydramine    | 14 μM        | PC3  | .876 | .273     | -.399 | D04AA32 R06AA02 | 1830 |             |
| 15      | 628  | thiamphenicol      | 11 μM        | PC3  | .875 | .248     | -.423 | J01BA02         | 1826 |             |
| 16      | 747  | isoniazid          | 29 μM        | MCF7 | .872 | .163     | -.506 | J04AC01         | 7197 |             |
| 17      | 661  | flucloxacillin     | 8 μM         | HL60 | .871 | .123     | -.545 | J01CF05         | 3128 |             |
| 18      | 683  | PHA-00745360       | 1 μM         | PC3  | .871 | .199     | -.468 |                 | 3827 |             |
| 19      | 747  | doxycycline        | 8 μM         | MCF7 | .868 | .143     | -.523 | J01AA02 A01AB22 | 7195 |             |
| 20      | 628  | isoflupredone      | 10 μM        | PC3  | .865 | .224     | -.440 |                 | 1832 |             |

Figure S2: Connectivity map of DAAD2 treated Hep3B cells
